# Supplementary material
Source: Copernicus journal article supplement (doi:10.5194/acp-26-6973-2026)
Supplement: Supplementary file 1 [file acp-26-6973-2026-supplement.pdf]

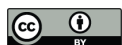

*Supplement of*

## **Reactions of carbonyl oxide with aldehydes: accurate electronic structure methods, kinetic insights, and atmospheric implications**

**Chaolu Xie and Bo Long**

*Correspondence to:* Bo Long ([wwwltcommon@sina.com](mailto:wwwltcommon@sina.com))

The copyright of individual parts of the supplement might differ from the article licence.

---

**CONTENTS**

|                                                                                                                                                                                                                                                                                                                                                          |             |
|----------------------------------------------------------------------------------------------------------------------------------------------------------------------------------------------------------------------------------------------------------------------------------------------------------------------------------------------------------|-------------|
| Table A1. Abbreviations for theoretical methods and basis set details                                                                                                                                                                                                                                                                                    | <b>S-4</b>  |
| Table S1. The barrier height of TS1 for the components in GMMQ.L4 method in the CH <sub>2</sub> OO + HCHO reaction. (in kcal/mol)                                                                                                                                                                                                                        | <b>S-4</b>  |
| Table S2. The relative enthalpies of activation at 0 K for the HCHO + CH <sub>2</sub> OO (TS1) and CH <sub>3</sub> CHO + CH <sub>2</sub> OO (TS2a and TS2b) reactions. (in kcal/mol)                                                                                                                                                                     | <b>S-5</b>  |
| Table S3. Standard scale factors for calculating vibrational frequencies different theoretical methods.                                                                                                                                                                                                                                                  | <b>S-5</b>  |
| Table S4. Specific Reaction Scale Factors Calculated by Using the M11-L/MG3S Method for HCHO                                                                                                                                                                                                                                                             | <b>S-6</b>  |
| Table S5. Specific Reaction Scale Factors Calculated by Using the MPW1K/6-311 + G(2df,2p) Method for RCHO (R = CH <sub>3</sub> /C <sub>2</sub> H <sub>5</sub> /C <sub>3</sub> H <sub>7</sub> /C <sub>4</sub> H <sub>9</sub> /C <sub>5</sub> H <sub>11</sub> )                                                                                            | <b>S-6</b>  |
| Table S6. The Lennard-Jone parameters used to calculate the collision rates are as follows.                                                                                                                                                                                                                                                              | <b>S-6</b>  |
| Table S7. The barrier height of TS1 for the components in MW2-F12.L method in the CH <sub>2</sub> OO + HCHO reaction. (in kcal/mol)                                                                                                                                                                                                                      | <b>S-7</b>  |
| Table S8. The barrier height of TS1 for the components in W2X method in the CH <sub>2</sub> OO + HCHO reaction. (in kcal/mol)                                                                                                                                                                                                                            | <b>S-8</b>  |
| Table S9. The enthalpy of activation at 0 K for the transition states of CH <sub>2</sub> OO + CH <sub>3</sub> CHO reaction by various theoretical methods (in kcal/mol)                                                                                                                                                                                  | <b>S-9</b>  |
| Table S10. Numbers of distinguishable structures and torsions                                                                                                                                                                                                                                                                                            | <b>S-10</b> |
| Table S11. The enthalpy of activation at 0 K (in kcal/mol) for the transition states of CH <sub>2</sub> OO + XCHO (X = C <sub>2</sub> H <sub>5</sub> / C <sub>3</sub> H <sub>7</sub> /C <sub>4</sub> H <sub>9</sub> /C <sub>5</sub> H <sub>11</sub> reaction as calculated using various theoretical methods with the standard vibrational scale factors | <b>S-11</b> |
| Table S12. The enthalpy of activation at 0 K (in kcal/mol) for the transition states of CH <sub>2</sub> OO + XCHO (X = CH <sub>2</sub> F/ CHF <sub>2</sub> /CF <sub>3</sub> ) reaction as calculated using various theoretical methods with the standard vibrational scale factors                                                                       | <b>S-12</b> |
| Table S13. Rate constants <i>k</i> (T, p) of the CH <sub>2</sub> OO + HCHO as a function of temperature and pressure by TST/Eckart method with subsequent reaction                                                                                                                                                                                       | <b>S-13</b> |
| Table S14. Rate constants <i>k</i> (T, p) of the CH <sub>2</sub> OO + CH <sub>3</sub> CHO for Scheme 3b as a function of temperature and pressure by TST/Eckart method.                                                                                                                                                                                  | <b>S-14</b> |
| Table S15. Rate constants <i>k</i> (T, p) of the CH <sub>2</sub> OO + CH <sub>3</sub> CHO for Scheme 3a as a function                                                                                                                                                                                                                                    |             |

---

|                                                                                                                                                                                                                                                                  |             |
|------------------------------------------------------------------------------------------------------------------------------------------------------------------------------------------------------------------------------------------------------------------|-------------|
| of temperature and pressure by TST/Eckart method                                                                                                                                                                                                                 | <b>S-15</b> |
| Table S16. The high-pressure limiting rate constants ( $\text{cm}^3 \text{ molecule}^{-1} \text{ s}^{-1}$ ) of the $\text{CH}_2\text{OO} + \text{HCHO}$ reaction                                                                                                 | <b>S-17</b> |
| Table S17. The high-pressure limiting rate constants ( $\text{cm}^3 \text{ molecule}^{-1} \text{ s}^{-1}$ ) of the $\text{CH}_2\text{OO} + \text{CH}_3\text{CHO}$ reaction                                                                                       | <b>S-18</b> |
| Table S18. The high-pressure limiting rate constants ( $\text{cm}^3 \text{ molecule}^{-1} \text{ s}^{-1}$ ) of the $\text{CH}_2\text{OO} + \text{C}_2\text{H}_5\text{CHO}$ reaction                                                                              | <b>S-19</b> |
| Table S19. The high-pressure limiting rate constants ( $\text{cm}^3 \text{ molecule}^{-1} \text{ s}^{-1}$ ) of the $\text{CH}_2\text{OO} + \text{C}_3\text{H}_7\text{CHO}$ reaction                                                                              | <b>S-20</b> |
| Table S20. The high-pressure limiting rate constants ( $\text{cm}^3 \text{ molecule}^{-1} \text{ s}^{-1}$ ) of the $\text{CH}_2\text{OO} + \text{C}_4\text{H}_9\text{CHO}$ reaction                                                                              | <b>S-21</b> |
| Table S21. The high-pressure limiting rate constants ( $\text{cm}^3 \text{ molecule}^{-1} \text{ s}^{-1}$ ) of the $\text{CH}_2\text{OO} + \text{C}_5\text{H}_{11}\text{CHO}$ reaction                                                                           | <b>S-22</b> |
| Table S22. The high-pressure limiting rate constants ( $\text{cm}^3 \text{ molecule}^{-1} \text{ s}^{-1}$ ) of the $\text{CH}_2\text{OO} + \text{CH}_2\text{FCHO}$ reaction                                                                                      | <b>S-23</b> |
| Table S23. The high-pressure limiting rate constants ( $\text{cm}^3 \text{ molecule}^{-1} \text{ s}^{-1}$ ) of the $\text{CH}_2\text{OO} + \text{CHF}_2\text{CHO}$ reaction                                                                                      | <b>S-24</b> |
| Table S24. The high-pressure limiting rate constants ( $\text{cm}^3 \text{ molecule}^{-1} \text{ s}^{-1}$ ) of the $\text{CH}_2\text{OO} + \text{CF}_3\text{CHO}$ reaction                                                                                       | <b>S-25</b> |
| Table S25. Fitting Parameters for all aldehydes.                                                                                                                                                                                                                 | <b>S-26</b> |
| Table S26. The rate constant for the conversion of C2b                                                                                                                                                                                                           | <b>S-26</b> |
| Table S27. Rate ratio $v_i$ between the reaction R2-R4 and $\text{OH} + \text{CH}_3\text{CHO}/\text{C}_2\text{H}_5\text{CHO}$ with different concentrations of OH and $\text{CH}_2\text{OO}$ at different heights from different region in GEOS-Chem             | <b>S-27</b> |
| Table S28. Rate ratio $v_i$ between the reaction R4-R5 and $\text{OH} + \text{C}_3\text{H}_7\text{CHO}/\text{C}_4\text{H}_9\text{CHO}$ with different concentrations of OH and $\text{CH}_2\text{OO}$ at different heights from different region in GEOS-Chem    | <b>S-27</b> |
| Table S29. Rate ratio $v_i$ between the reaction R6-R7 and $\text{OH} + \text{C}_4\text{H}_9\text{CHO}/\text{C}_5\text{H}_{11}\text{CHO}$ with different concentrations of OH and $\text{CH}_2\text{OO}$ at different heights from different region in GEOS-Chem | <b>S-28</b> |
| Table S30. The fitting rate constants of reactions in the GEOS-Chem                                                                                                                                                                                              | <b>S-28</b> |
| Table S31. Absolute energies (Hartree) and the Cartesian coordinates ( $\text{\AA}$ ) of the optimized geometries calculated by M11-L/MG3S.                                                                                                                      | <b>S-29</b> |
| Table S32. Absolute energies in Hartrees                                                                                                                                                                                                                         | <b>S-41</b> |

- 
- Figure S1. The relative enthalpies at 0 K for the reaction of  $\text{CH}_2\text{OO} + \text{RCHO}$  ( $\text{R} = \text{C}_2\text{H}_5/\text{C}_3\text{H}_7$ ). Values are given for all species as calculated by M11-L/MG3S, and in parentheses and bracket, values are given for the transition state TS path as calculated by W3X-L and BE1. **S-44**
- Figure S2. The relative enthalpies at 0 K for the reaction of  $\text{CH}_2\text{OO} + \text{RCHO}$  ( $\text{R} = \text{C}_4\text{H}_9/\text{C}_5\text{H}_{11}$ ). Values are given for all species as calculated by M11-L/MG3S, and in parentheses, values are given for the transition state TS path as calculated by BE1. **S-44**
- Figure S3. The relative enthalpies at 0 K for the reaction of  $\text{CH}_2\text{OO} + \text{CH}_2\text{FCHO}/\text{CHF}_2\text{CHO}/\text{CF}_3\text{CHO}$ . in parentheses and bracket, values are given for the transition states as calculated by BE1//DF-CCSD(T)-F12b/jun-cc-pVDZ and BE2//DF-CCSD(T)-F12b/jun-cc-pVDZ. **S-45**
- Figure S4. Enthalpy profile at 0 K for the conversion of C2b to C2d as calculated by M11-L/MG3S **S-46**
- Figure S5. Enthalpy profile at 0 K for the conversion of C3 to C3A as calculated by M11-L/MG3S. **S-46**
- Figure S6. Enthalpy profile at 0 K for the conversion of C4 to C4A as calculated by M11-L/MG3S. **S-47**
- Figure S7. The rate ratio  $v_2$  between the reaction of  $\text{CH}_2\text{OO} + \text{CH}_3\text{CHO}$  and  $\text{OH} + \text{CH}_3\text{CHO}$  at  $[\text{CH}_2\text{OO}] = 10^4 \text{ molecules cm}^{-3}$  with different concentrations of OH in the temperature range of 190–350 K **S-47**
- Figure S8. Changes in global  $\text{CH}_3\text{CHO}$  concentrations due to reaction R2 **S-48**
- Figure S9. Changes in global  $\text{HCOOH}$  and  $\text{CH}_3\text{COOH}$  concentrations due to reactions R1 and R2 **S-48**
- Reference **S-49**

The method GMMQ.L4 is extension of previous investigations. The GMM(P).L1 (Long et al., 2022), GMM(P).L2 (Long et al., 2023) and GMMQ.L3 (Xia et al., 2025) was completed by Long et al., and Xia et al.

### Details of reaction R9

The enthalpy of activation for tight transition state of R9 were calculated to be  $-9.74$  kcal/mol at M11-L/MG3S level as the DF-CCSD(T)-F12b/jun-cc-pVDZ optimization converges to the product. We did not focus on finding a tight transition state because we found that this transition state had almost no effect on the overall rate constant due to the low energy barrier.

**Table A1.** Explanations for details in kinetics.

| Kinetics methods               | Explanation                                                                                                                                                           | Ref.                                        |
|--------------------------------|-----------------------------------------------------------------------------------------------------------------------------------------------------------------------|---------------------------------------------|
| anharmonicity                  | A factor to scale vibrational frequencies for calculating the zero-point energy and vibrational partition functions                                                   | (Long et al., 2023)                         |
| re-crossing                    | Probability of transition state to pre-reaction complex                                                                                                               | (Zheng and Truhlar, 2012)                   |
| dual-level strategy            | The combination of conventional transition state theory (TST) at HL with canonical variational transition state theory with small-curvature tunneling (CVT/SCT) at LL | (Long et al., 2016, 2019; Sun et al., 2024) |
| multi-structural anharmonicity | The effect of multiple conformations on rate constants                                                                                                                | (Zheng et al., 2012)                        |

**Table S1.** The barrier height of TS1 for the components in GMMQ.L4 method in the  $\text{CH}_2\text{OO} + \text{HCHO}$  reaction. (in kcal/mol)

| Methods                 | $\Delta V^\ddagger$ |
|-------------------------|---------------------|
| MW2-F12.L               | $-8.35$             |
| CCSDT-CCSD(T)/cc-pVDZ   | $0.274$             |
| CCSDT-CCSD(T)/cc-pVTZ   | $0.259$             |
| CCSDT-CCSD(T)/CBS       | $0.252$             |
| CCSDT(Q)-CCSDT/cc-pVDZ  | $0.335$             |
| CCSDT(Q)-CCSDT/VTZ(d)   | $0.297$             |
| CCSDT(Q)-CCSDT/CBS      | $0.281$             |
| CCSDTQ-CCSDT(Q)/VDZ(NP) | $-0.096$            |
| GMMQ.L4                 | $-7.91$             |

**Table S2.** The relative enthalpies of activation at 0 K for the HCHO + CH<sub>2</sub>OO (TS1) and CH<sub>3</sub>CHO + CH<sub>2</sub>OO (TS2a and TS2b) reactions. (in kcal/mol)

| Methods                          | $\Delta H_0^\ddagger$ |                   |                   | MUD  |
|----------------------------------|-----------------------|-------------------|-------------------|------|
|                                  | TS1 <sup>a</sup>      | TS2a <sup>b</sup> | TS2c <sup>b</sup> |      |
| Best Estimate for W2X            | -5.62                 | -5.24             | -5.19             | 0.00 |
| W2X//DF-CCSD(T)-F12b/VDZ(d)      | -5.66                 | -5.24             | -5.23             | 0.03 |
| W2X//DF-CCSD(T)-F12a/jun-cc-pVDZ | -5.60                 | -5.35             | -5.19             | 0.04 |
| W2X//DF-CCSD(T)-F12a/cc-pVDZ     | -5.72                 | -5.29             | -5.35             | 0.10 |
| W2X//DF-CCSD(T)-F12b/VDZ(NP)     | -6.19                 | -5.01             | -5.82             | 0.48 |

<sup>a</sup>The best estimate results are from W2X//CCSD(T)-F12a/cc-pVTZ-F12 for the reaction of CH<sub>2</sub>OO + HCHO

<sup>b</sup>The best estimate results are from W2X//CCSD(T)-F12a/cc-pVDZ-F12 for the reaction of CH<sub>2</sub>OO + CH<sub>3</sub>CHO

**Table S3.** Standard scale factors for calculating vibrational frequencies different theoretical methods.

| Method                          | Scale Factor |
|---------------------------------|--------------|
| CCSD(T)-F12a/cc-pVTZ-F12        | 0.984        |
| CCSD(T)-F12a/cc-pVDZ-F12        | 0.983        |
| DF-CCSD(T)-F12b/jun-cc-pVDZ-F12 | 0.981        |
| DF-CCSD(T)-F12b/cc-pVDZ         | 0.977        |
| DF-CCSD(T)-F12b/VDZ(NP)         | 0.993        |
| DF-CCSD(T)-F12b/VDZ(d)          | 0.989        |
| M11L/MG3S                       | 0.985        |

**Table S4.** Specific Reaction Scale Factors Calculated by Using the M11-L/MG3S Method for HCHO.

|                                                                    | CH <sub>2</sub> OO | HCHO   | TS     |
|--------------------------------------------------------------------|--------------------|--------|--------|
| ZPE (Harm)                                                         | 19.290             | 16.297 | 38.298 |
| ZPE (Anh)                                                          | 19.303             | 16.130 | 37.949 |
| $\lambda^{\text{Anh a}}$                                           | 1.001              | 0.990  | 0.991  |
| $\lambda_{\text{H}}$                                               | 0.998              | 0.998  | 0.998  |
| $\lambda^{\text{ZPE}} = \lambda^{\text{Anh}} * \lambda_{\text{H}}$ | 0.999              | 0.988  | 0.989  |

<sup>a</sup>  $\lambda^{\text{Anh}}$  equals the ratio of anharmonic zero-point vibrational energy to harmonic zero-point vibrational energy of the M11-L/MG3S method

<sup>b</sup>  $\lambda^{\text{ZPE}}$  equals the product of and the generic parameter, where  $\lambda_{\text{H}}$  is obtained from previous studies that gave  $\lambda_{\text{H}}$  equal to 0.998 for CCSD(T)-F12a/cc-pVTZ-F12.

**Table S5.** Specific Reaction Scale Factors Calculated by Using the MPW1K/6-311 + G(2df,2p) Method for RCHO (R = CH<sub>3</sub>/C<sub>2</sub>H<sub>5</sub>/C<sub>3</sub>H<sub>7</sub>/C<sub>4</sub>H<sub>9</sub>/C<sub>5</sub>H<sub>11</sub>)

|                                                                    | CH <sub>2</sub> OO | CH <sub>3</sub> CHO | CH <sub>3</sub> CH <sub>2</sub> CHO | C <sub>4</sub> H <sub>7</sub> CHO | C <sub>5</sub> H <sub>9</sub> CHO | C <sub>6</sub> H <sub>11</sub> CHO |
|--------------------------------------------------------------------|--------------------|---------------------|-------------------------------------|-----------------------------------|-----------------------------------|------------------------------------|
| ZPE (Harm)                                                         | 20.309             | 35.743              | 54.286                              | 72.614                            | 91.072                            | 91.072                             |
| ZPE (Anh)                                                          | 20.072             | 35.295              | 53.612                              | 71.723                            | 89.939                            | 89.939                             |
| $\lambda^{\text{Anh a}}$                                           | 0.988              | 0.987               | 0.988                               | 0.988                             | 0.988                             | 0.988                              |
| $\lambda_{\text{H}}$                                               | 0.997              | 0.997               | 0.997                               | 0.997                             | 0.997                             | 0.997                              |
| $\lambda^{\text{ZPE}} = \lambda^{\text{Anh}} * \lambda_{\text{H}}$ | 0.985              | 0.985               | 0.985                               | 0.985                             | 0.985                             | 0.986                              |
|                                                                    | TS1                | TS2c                | TS3                                 | TS4                               | TS5                               | TS6                                |
| ZPE (Harm)                                                         | 56.837             | 58.233              | 76.782                              | 95.016                            | 113.285                           | 113.285                            |
| ZPE (Anh)                                                          | 56.138             | 57.53               | 75.817                              | 93.871                            | 111.916                           | 111.916                            |
| $\lambda^{\text{Anh}}$                                             | 0.988              | 0.988               | 0.987                               | 0.988                             | 0.988                             | 0.988                              |
| $\lambda_{\text{H}}$                                               | 0.997              | 0.997               | 0.997                               | 0.997                             | 0.997                             | 0.998                              |
| $\lambda^{\text{ZPE}} = \lambda^{\text{Anh}} * \lambda_{\text{H}}$ | 0.985              | 0.985               | 0.985                               | 0.985                             | 0.985                             | 0.986                              |

<sup>a</sup>  $\lambda^{\text{Anh}}$  equals the ratio of anharmonic zero-point vibrational energy to harmonic zero-point vibrational energy of the MPW1K/6-311 + G(2df,2p) method

<sup>b</sup>  $\lambda^{\text{ZPE}}$  equals the product of and the generic parameter, where  $\lambda_{\text{H}}$  is obtained from previous studies, which equals to 0.997 for DF-CCSD(T)-F12b/jun-cc-pVDZ and DF-CCSD(T)-F12/jun-cc-pVDZ, and 0.998 for DF-CCSD(T)-F12/VDZ(d).

**Table S6.** The Lennard-Jone parameters used to calculate the collision rates are as follows.

| molecules           | $\sigma$ (in Å) | $\varepsilon$ (in K) | Reference             |
|---------------------|-----------------|----------------------|-----------------------|
| N <sub>2</sub>      | 3.74            | 82                   | (Kuwata et al., 2010) |
| CH <sub>2</sub> OO  | 3.79            | 520                  | (Berndt et al., 2015) |
| HCHO                | 3.66            | 385.2                |                       |
| CH <sub>3</sub> CHO | 4.94            | 191.134              |                       |

The Lennard-Jones parameter for complex is obtained by the following two formulas:

$$\sigma = \frac{\sigma_1 \sigma_2}{2} \quad (1) \qquad \varepsilon = \sqrt{\varepsilon_1 \varepsilon_2} \quad (2)$$

$\sigma$  is the hard-core diameter, and  $\varepsilon$  is a measure of the strength of the spherically symmetric part of the perturbation.

**Table S7.** The barrier height of TS1 for the components in MW2-F12.L method in the CH<sub>2</sub>OO + HCHO reaction. (in kcal/mol)

| Methods                         | $\Delta V^\ddagger$    |
|---------------------------------|------------------------|
|                                 | MW2-F12.L <sup>a</sup> |
| HF(CABS)/VQZ-F12                | -4.23                  |
| CCSD-F12b/VQZ-F12               | -7.69                  |
| HF(CABS)/V5Z-F12                | -4.21                  |
| CCSD-F12b/V5Z-F12               | -7.64                  |
| CCSD/AVQZ                       | -7.75                  |
| CCSD(T)/AVQZ                    | -8.71                  |
| CCSD/AV5Z                       | -7.64                  |
| CCSD(T)/AV5Z                    | -8.59                  |
| CCSD(T)/awCVTZ                  | -8.79                  |
| CCSD(T)(CV)/awCVTZ              | -8.67                  |
| CCSD(T)/awCVQZ                  | -8.59                  |
| CCSD(T)(CV)/awCVQZ              | -8.43                  |
| CCSD(T)/aVQZ                    | -8.71                  |
| CCSD(T)CR/aVQZ                  | -8.69                  |
| E[HF] <sup>a</sup>              | -4.21                  |
| E[ $\Delta$ CCSD] <sup>b</sup>  | -3.39                  |
| E[ $\Delta$ (T)] <sup>c</sup>   | -0.95                  |
| E[ $\Delta$ (C+V)] <sup>d</sup> | 0.19                   |
| E[ $\Delta$ (C+R)] <sup>e</sup> | 0.01                   |

<sup>a</sup> E[HF] is equals to HF(CABS)/V5Z-F12.

<sup>b</sup> E[ $\Delta$ CCSD] is equals to (CCSD-F12b/V5Z-F12 - HF(CABS)/V5Z-F12)+((CCSD-F12b/V5Z-F12- HF(CABS)/V5Z-F12)-(CCSD-F12b/VQZ-F12 - HF(CABS)/VQZ-F12))/(1.25<sup>3</sup>.2711-1).

<sup>c</sup> E[ $\Delta$ (T)] is equals to (CCSD(T)/AV5Z - CCSD/AV5Z)+((CCSD(T)/AV5Z - CCSD/AV5Z)-(CCSD(T)/AVQZ - CCSD/AVQZ))/(1.25<sup>3</sup>.8270-1).

<sup>d</sup> E[ $\Delta$ (C+V)] is equals to (CCSD(T)(CV)/awCVQZ - CCSD(T)/awCVQZ)+((CCSD(T)(CV)/awCVQZ - CCSD(T)/awCVQZ)-(CCSD(T)(CV)/awCVTZ - CCSD(T)/awCVTZ))/(1.3333<sup>3</sup>-1).

<sup>e</sup> E[ $\Delta$ (C+R)] is equals to CCSD(T)CR/aVQZ - CCSD(T)/aVQZ.

**Table S8.** The barrier height of TS1 for the components in W2X method in the CH<sub>2</sub>OO + HCHO reaction. (in kcal/mol)

| Methods                         | $\Delta V^\ddagger$ |
|---------------------------------|---------------------|
|                                 | W2X                 |
| HF(CABS)/7-TZ <sup>a</sup>      | -4.25               |
| CCSD-F12b/7-TZ                  | -7.73               |
| CCSD(T)-F12b/7-TZ               | -8.69               |
| HF(CABS)/7-QZ <sup>b</sup>      | -4.23               |
| CCSD-F12b/7-QZ                  | -7.69               |
| MP2/CVTZ(3d) <sup>c</sup>       | -9.83               |
| MP2(CR)/CVTZ(3d)                | -9.73               |
| MP2/CVDZ(2d) <sup>d</sup>       | -11.30              |
| CCSD(T)/CVDZ(2d)                | -8.96               |
| MP2(CR)/CVDZ(2d)                | -11.38              |
| CCSD(T)(CR)/CVDZ(2d)            | -9.03               |
| E[HF] <sup>e</sup>              | -4.23               |
| E[ $\Delta$ CCSD] <sup>f</sup>  | -3.45               |
| E[ $\Delta$ (T)] <sup>g</sup>   | -1.00               |
| E[ $\Delta$ (C+R)] <sup>h</sup> | 0.13                |

<sup>a</sup> 7-TZ is VTZ for H, and AVTZ for C and O.

<sup>b</sup> 7-QZ is VQZ for H, and AVQZ for C and O.

<sup>c</sup> CVTZ(3d) is VTZ for H, cc-pCVTZ and cc-pCVQZ for sp and d orbital of C and O.

<sup>d</sup> CVDZ(2d) is VDZ for H, cc-pCVDZ and cc-pCVTZ for sp and d orbital of C and O.

<sup>e</sup> E[HF] is equal to HF(CABS)/7-QZ.

<sup>f</sup> E[ $\Delta$ CCSD] is equal to (CCSD-F12b/7-QZ - HF(CABS)/7-QZ)-(CCSD-F12b/7-QZ - HF(CABS)/7-QZ)-(CCSD-F12b/7-TZ - HF(CABS)/7-TZ))\*4<sup>-5.8769</sup>/(4<sup>-5.8769</sup>-3<sup>-5.8769</sup>)

<sup>g</sup> E[ $\Delta$ (T)] is (CCSD(T)-F12b/7-TZ - CCSD-F12b/7-TZ)\*1.0607

<sup>h</sup> E[ $\Delta$ (C+R)] is equal to (MP2(CR)/CVTZ(3d) - MP2/CVTZ(3d))\*1.1383+(( CCSD(T)(CR)/CVDZ(2d) - CCSD(T)/CVDZ(2d))- (MP2(CR)/CVDZ(2d) - MP2/CVDZ(2d)))\*1.5577

**Table S9.** The enthalpy of activation at 0 K for the transition states of CH<sub>2</sub>OO + CH<sub>3</sub>CHO reaction by various theoretical methods (in kcal/mol).

| Methods                          | $\Delta H_0^\ddagger$ |       | MUD  |
|----------------------------------|-----------------------|-------|------|
|                                  | TS2a                  | TS2c  |      |
| BE1//CCSD(T)-F12a/cc-pVDZ-F12    | -4.90                 | -4.50 | 0.00 |
| BE2//CCSD(T)-F12a/cc-pVDZ-F12    | -4.60                 | -4.55 | 0.15 |
| W3X-L//CCSD(T)-F12a/cc-pVDZ-F12  | -5.12                 | -4.75 | 0.24 |
| W2X//CCSD(T)-F12a/cc-pVDZ-F12    | -5.24                 | -5.19 | 0.52 |
| W2X//DF-CCSD(T)-F12a/jun-cc-pVDZ | -5.35                 | -5.19 | 0.57 |
| W2X//DF-CCSD(T)-F12a/cc-pVDZ     | -5.29                 | -5.35 | 0.62 |
| W2X//DF-CCSD(T)-F12b/VDZ(NP)     | -5.01                 | -5.82 | 0.72 |
| W2X//DF-CCSD(T)-F12b/VDZ(d)      | -5.24                 | -5.23 | 0.54 |
| CCSD(T)-F12a/cc-pVDZ-F12         | -5.15                 | -5.04 | 0.40 |
| DF-CCSD(T)-F12a/jun-cc-pVDZ      | -5.82                 | -4.88 | 0.66 |
| DF-CCSD(T)-F12a/cc-pVDZ          | -6.36                 | -6.42 | 1.70 |
| DF-CCSD(T)-F12b/VDZ(NP)          | -7.63                 | -8.38 | 3.31 |
| DF-CCSD(T)-F12b/VDZ(d)           | -6.25                 | -6.58 | 1.72 |
| M11-L/MG3S                       | -4.68                 | -4.05 | 0.81 |
| M08-HX/MG3S                      | -6.61                 | -6.58 | 1.90 |
| M06CR/MG3S                       | -5.61                 | -3.40 | 1.16 |
| MN15-L/MG3S                      | -6.40                 | -6.43 | 1.72 |

**Table S10.** Numbers of distinguishable structures and torsions

|                                    | molecule                                                                            | distinguishable structures | torsions                                                                     |
|------------------------------------|-------------------------------------------------------------------------------------|----------------------------|------------------------------------------------------------------------------|
| C <sub>2</sub> H <sub>5</sub> CHO  | 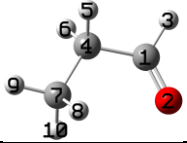   | 2                          | 10-7-4-1<br>7-4-1-2                                                          |
| C <sub>3</sub> H <sub>7</sub> CHO  |    | 4                          | 13-10-7-4<br>10-7-4-1<br>7-4-1-2                                             |
| C <sub>4</sub> H <sub>9</sub> CHO  |    | 12                         | 16-13-10-7<br>13-10-7-4<br>10-7-4-1<br>7-4-1-2                               |
| C <sub>5</sub> H <sub>11</sub> CHO |    | 35                         | 19-16-13-10<br>16-13-10-7<br>13-10-7-4<br>10-7-4-1<br>7-4-1-2                |
| TS3                                |   | 6                          | 15-12-9-7<br>12-9-7-6<br>9-7-2-1                                             |
| TS4                                |  | 18                         | 18-15-12-9<br>15-12-9-7<br>12-9-7-6<br>9-7-2-1                               |
| TS5                                |  | 24                         | 21-18-15-12<br>18-15-12-9<br>15-12-9-7<br>12-9-7-6<br>9-7-2-1                |
| TS6                                |  | 79                         | 24-21-18-15<br>21-18-15-12<br>18-15-12-9<br>15-12-9-7<br>12-9-7-6<br>9-7-2-1 |

**Table S11.** The enthalpy of activation at 0 K (in kcal/mol) for the transition states of  $\text{CH}_2\text{OO} + \text{XCHO}$  ( $\text{X} = \text{C}_2\text{H}_5/\text{C}_3\text{H}_7/\text{C}_4\text{H}_9/\text{C}_5\text{H}_{11}$  reaction as calculated using various theoretical methods with the standard vibrational scale factors

| Method                             | $\Delta H_0^\ddagger$ |      |
|------------------------------------|-----------------------|------|
|                                    | TS3                   | UD   |
| BE1//DF-CCSD(T)-F12b/jun-cc-pVDZ   | -4.50                 | 0.00 |
| BE2//DF-CCSD(T)-F12b/jun-cc-pVDZ   | -4.52                 | 0.02 |
| W3X-L//DF-CCSD(T)-F12a/jun-cc-pVDZ | -4.79                 | 0.29 |
| W2X//DF-CCSD(T)-F12a/jun-cc-pVDZ   | -5.16                 | 0.66 |
| W2X//DF-CCSD(T)-F12a/cc-pVDZ       | -5.19                 | 0.69 |
| W2X//DF-CCSD(T)-F12b/VDZ(d)        | -5.20                 | 0.70 |
| DF-CCSD(T)-F12a/jun-cc-pVDZ        | -5.11                 | 0.61 |
| DF-CCSD(T)-F12a/cc-pVDZ            | -6.87                 | 2.37 |
| DF-CCSD(T)-F12b/VDZ(d)             | -7.03                 | 2.53 |
| M11-L/MG3S                         | -4.25                 | 0.25 |
| Method                             | $\Delta H_0^\ddagger$ |      |
|                                    | TS4                   | UD   |
| BE1//DF-CCSD(T)-F12b/jun-cc-pVDZ   | -4.63                 | 0.00 |
| BE2//DF-CCSD(T)-F12b/jun-cc-pVDZ   | -4.64                 | 0.01 |
| W3X-L//DF-CCSD(T)-F12a/VDZ(d)      | -4.91                 | 0.28 |
| W2X//DF-CCSD(T)-F12a/jun-cc-pVDZ   | -5.29                 | 0.66 |
| W2X//DF-CCSD(T)-F12a/cc-pVDZ       | -5.40                 | 0.77 |
| W2X//DF-CCSD(T)-F12b/VDZ(d)        | -5.35                 | 0.72 |
| DF-CCSD(T)-F12a/jun-cc-pVDZ        | -5.29                 | 0.66 |
| DF-CCSD(T)-F12a/cc-pVDZ            | -7.00                 | 2.37 |
| DF-CCSD(T)-F12b/VDZ(d)             | -7.15                 | 2.52 |
| M11-L/MG3S                         | -4.33                 | 0.30 |
| Method                             | $\Delta H_0^\ddagger$ |      |
|                                    | TS5                   | UD   |
| BE1//DF-CCSD(T)-F12b/jun-cc-pVDZ   | -4.70                 | 0.00 |
| BE2//DF-CCSD(T)-F12b/jun-cc-pVDZ   | -4.70                 | 0.00 |
| W2X//DF-CCSD(T)-F12a/jun-cc-pVDZ   | -5.35                 | 0.72 |
| W2X//DF-CCSD(T)-F12a/cc-pVDZ       | -5.46                 | 0.83 |
| W2X//DF-CCSD(T)-F12b/VDZ(d)        | -5.41                 | 0.78 |
| DF-CCSD(T)-F12a/jun-cc-pVDZ        | -5.38                 | 0.75 |
| DF-CCSD(T)-F12a/cc-pVDZ            | -7.08                 | 2.45 |
| DF-CCSD(T)-F12b/VDZ(d)             | -7.22                 | 2.59 |
| M11-L/MG3S                         | -4.37                 | 0.33 |
| Method                             | $\Delta H_0^\ddagger$ |      |
|                                    | TS6                   | UD   |
| BE1//DF-CCSD(T)-F12b/VDZ(d)        | -4.80                 | 0.00 |
| BE2//DF-CCSD(T)-F12b/VDZ(d)        | -4.84                 | 0.04 |
| W2X//DF-CCSD(T)-F12a/cc-pVDZ       | -5.55                 | 0.75 |
| W2X//DF-CCSD(T)-F12b/VDZ(d)        | -5.48                 | 0.68 |
| DF-CCSD(T)-F12a/cc-pVDZ            | -7.16                 | 2.36 |
| DF-CCSD(T)-F12b/VDZ(d)             | -7.22                 | 2.42 |
| M11-L/MG3S                         | -4.33                 | 0.47 |

**Table S12.** The enthalpy of activation at 0 K (in kcal/mol) for the transition states of  $\text{CH}_2\text{OO} + \text{XCHO}$  ( $\text{X} = \text{CH}_2\text{F}/\text{CHF}_2/\text{CF}_3$ ) reaction as calculated using various theoretical methods with the standard vibrational scale factors

| Method                             | $\Delta H_0^\ddagger$ |      |
|------------------------------------|-----------------------|------|
|                                    | TS7                   | UD   |
| BE1//DF-CCSD(T)-F12b/jun-cc-pVDZ   | -6.21                 | 0.00 |
| BE2//DF-CCSD(T)-F12b/jun-cc-pVDZ   | -6.24                 | 0.03 |
| W3X-L//DF-CCSD(T)-F12a/jun-cc-pVDZ | -6.42                 | 0.21 |
| W2X//DF-CCSD(T)-F12a/jun-cc-pVDZ   | -6.88                 | 0.67 |
| DF-CCSD(T)-F12a/jun-cc-pVDZ        | -6.83                 | 0.62 |
| M11-L/MG3S                         | -5.98                 | 0.23 |
| Method                             | $\Delta H_0^\ddagger$ |      |
|                                    | TS8                   | UD   |
| BE1//DF-CCSD(T)-F12b/jun-cc-pVDZ   | -7.96                 | 0.00 |
| BE2//DF-CCSD(T)-F12b/jun-cc-pVDZ   | -7.99                 | 0.03 |
| W2X//DF-CCSD(T)-F12a/jun-cc-pVDZ   | -8.63                 | 0.67 |
| DF-CCSD(T)-F12a/jun-cc-pVDZ        | -8.74                 | 0.78 |
| M11-L/MG3S                         | -8.40                 | 0.44 |
| Method                             | $\Delta H_0^\ddagger$ |      |
|                                    | TS9                   | UD   |
| M11-L/MG3S                         | -9.74                 | 0.00 |

**Table S13.** Rate constants  $k(T, p)$  of the  $\text{CH}_2\text{OO} + \text{HCHO}$  as a function of temperature and pressure by TST/Eckart method with subsequent reaction.

|         |          |          |          |          |
|---------|----------|----------|----------|----------|
| P (bar) | 200 K    | 220 K    | 240 K    | 260 K    |
| 0.0316  | 3.88E-10 | 2.61E-10 | 1.46E-10 | 7.65E-11 |
| 0.1     | 4.00E-10 | 2.71E-10 | 1.53E-10 | 8.14E-11 |
| 0.178   | 4.05E-10 | 2.76E-10 | 1.57E-10 | 8.38E-11 |
| 0.316   | 4.05E-10 | 2.76E-10 | 1.57E-10 | 8.39E-11 |
| 0.562   | 4.07E-10 | 2.78E-10 | 1.58E-10 | 8.48E-11 |
| 1       | 4.07E-10 | 2.78E-10 | 1.59E-10 | 8.51E-11 |
| 1.78    | 4.08E-10 | 2.79E-10 | 1.59E-10 | 8.54E-11 |
| 3.16    | 4.09E-10 | 2.80E-10 | 1.59E-10 | 8.56E-11 |
| 5.62    | 4.10E-10 | 2.80E-10 | 1.60E-10 | 8.58E-11 |
| 31.6    | 4.11E-10 | 2.81E-10 | 1.60E-10 | 8.60E-11 |
| 100     | 4.14E-10 | 2.82E-10 | 1.61E-10 | 8.64E-11 |
| 1000    | 4.18E-10 | 2.85E-10 | 1.62E-10 | 8.70E-11 |
| P (bar) | 275 K    | 280K     | 295 K    | 298 K    |
| 0.0316  | 4.70E-11 | 4.01E-11 | 2.52E-11 | 2.31E-11 |
| 0.1     | 5.06E-11 | 4.33E-11 | 2.75E-11 | 2.52E-11 |
| 0.178   | 5.24E-11 | 4.49E-11 | 2.88E-11 | 2.64E-11 |
| 0.316   | 5.24E-11 | 4.50E-11 | 2.89E-11 | 2.65E-11 |
| 0.562   | 5.31E-11 | 4.56E-11 | 2.94E-11 | 2.70E-11 |
| 1       | 5.34E-11 | 4.59E-11 | 2.95E-11 | 2.71E-11 |
| 1.78    | 5.36E-11 | 4.61E-11 | 2.97E-11 | 2.73E-11 |
| 3.16    | 5.38E-11 | 4.62E-11 | 2.98E-11 | 2.74E-11 |
| 5.62    | 5.39E-11 | 4.63E-11 | 2.99E-11 | 2.75E-11 |
| 31.6    | 5.40E-11 | 4.64E-11 | 3.00E-11 | 2.76E-11 |
| 100     | 5.42E-11 | 4.66E-11 | 3.01E-11 | 2.76E-11 |
| 1000    | 5.46E-11 | 4.69E-11 | 3.02E-11 | 2.78E-11 |
| P (bar) | 300 K    | 320 K    | 340 K    |          |
| 0.0316  | 2.18E-11 | 1.26E-11 | 7.59E-12 |          |
| 0.1     | 2.39E-11 | 1.39E-11 | 8.56E-12 |          |
| 0.178   | 2.50E-11 | 1.47E-11 | 9.14E-12 |          |
| 0.316   | 2.50E-11 | 1.47E-11 | 9.16E-12 |          |
| 0.562   | 2.55E-11 | 1.50E-11 | 9.41E-12 |          |
| 1       | 2.57E-11 | 1.52E-11 | 9.50E-12 |          |
| 1.78    | 2.58E-11 | 1.53E-11 | 9.59E-12 |          |
| 3.16    | 2.59E-11 | 1.53E-11 | 9.65E-12 |          |
| 5.62    | 2.60E-11 | 1.54E-11 | 9.68E-12 |          |
| 31.6    | 2.61E-11 | 1.54E-11 | 9.71E-12 |          |
| 100     | 2.61E-11 | 1.55E-11 | 9.74E-12 |          |
| 1000    | 2.63E-11 | 1.55E-11 | 9.79E-12 |          |

**Table S14.** Rate constants  $k$  (T, p) of the  $\text{CH}_2\text{OO} + \text{CH}_3\text{CHO}$  for Scheme 2b as a function of temperature and pressure by TST/Eckart method.

|          |          |          |          |          |
|----------|----------|----------|----------|----------|
| P (Torr) | 200 K    | 220 K    | 240 K    | 260 K    |
| 4.00     | 6.69E-11 | 2.35E-11 | 1.02E-11 | 5.11E-12 |
| 9.75     | 6.61E-11 | 2.35E-11 | 1.02E-11 | 5.12E-12 |
| 23.7     | 6.63E-11 | 2.36E-11 | 1.02E-11 | 5.13E-12 |
| 25       | 6.63E-11 | 2.36E-11 | 1.02E-11 | 5.13E-12 |
| 50       | 6.65E-11 | 2.36E-11 | 1.02E-11 | 5.14E-12 |
| 75       | 6.67E-11 | 2.37E-11 | 1.02E-11 | 5.15E-12 |
| 133.5    | 6.71E-11 | 2.38E-11 | 1.03E-11 | 5.17E-12 |
| 237      | 6.79E-11 | 2.41E-11 | 1.04E-11 | 5.21E-12 |
| 412.5    | 6.93E-11 | 2.45E-11 | 1.05E-11 | 5.27E-12 |
| 750      | 7.18E-11 | 2.52E-11 | 1.08E-11 | 5.39E-12 |
| 1335     | 7.54E-11 | 2.65E-11 | 1.13E-11 | 5.58E-12 |
| 2370     | 8.11E-11 | 2.81E-11 | 1.20E-11 | 5.91E-12 |
| 3000     | 8.39E-11 | 2.89E-11 | 1.25E-11 | 6.10E-12 |
| 4215     | 8.82E-11 | 3.03E-11 | 1.27E-11 | 6.45E-12 |
| 7500     | 9.49E-11 | 3.24E-11 | 1.35E-11 | 6.51E-12 |
| P (Torr) | 280 K    | 293 K    | 295 K    | 298 K    |
| 4.00     | 2.88E-12 | 1.84E-12 | 1.76E-12 | 1.65E-12 |
| 9.75     | 2.88E-12 | 1.85E-12 | 1.77E-12 | 1.65E-12 |
| 23.7     | 2.89E-12 | 1.85E-12 | 1.77E-12 | 1.65E-12 |
| 25       | 2.89E-12 | 1.85E-12 | 1.77E-12 | 1.65E-12 |
| 50       | 2.89E-12 | 1.85E-12 | 1.77E-12 | 1.66E-12 |
| 75       | 2.90E-12 | 1.86E-12 | 1.77E-12 | 1.66E-12 |
| 133.5    | 2.91E-12 | 1.86E-12 | 1.78E-12 | 1.66E-12 |
| 237      | 2.93E-12 | 1.87E-12 | 1.79E-12 | 1.67E-12 |
| 412.5    | 2.96E-12 | 1.89E-12 | 1.81E-12 | 1.69E-12 |
| 750      | 3.01E-12 | 1.92E-12 | 1.83E-12 | 1.72E-12 |
| 1335     | 3.11E-12 | 1.97E-12 | 1.89E-12 | 1.76E-12 |
| 2370     | 3.26E-12 | 2.06E-12 | 1.97E-12 | 1.84E-12 |
| 3000     | 3.35E-12 | 2.12E-12 | 2.02E-12 | 1.88E-12 |
| 4215     | 3.52E-12 | 2.21E-12 | 2.11E-12 | 1.96E-12 |
| 7500     | 3.93E-12 | 2.45E-12 | 2.33E-12 | 2.16E-12 |
| P (Torr) | 320 K    | 340 K    |          |          |
| 4.00     | 1.06E-12 | 7.46E-13 |          |          |
| 9.75     | 1.06E-12 | 7.50E-13 |          |          |
| 23.7     | 1.06E-12 | 7.52E-13 |          |          |
| 25       | 1.06E-12 | 7.52E-13 |          |          |
| 50       | 1.06E-12 | 7.53E-13 |          |          |
| 75       | 1.06E-12 | 7.54E-13 |          |          |
| 133.5    | 1.07E-12 | 7.55E-13 |          |          |
| 237      | 1.07E-12 | 7.58E-13 |          |          |

|       |          |          |  |  |
|-------|----------|----------|--|--|
| 412.5 | 1.08E-12 | 7.63E-13 |  |  |
| 750   | 1.09E-12 | 7.72E-13 |  |  |
| 1335  | 1.12E-12 | 7.86E-13 |  |  |
| 2370  | 1.16E-12 | 8.10E-13 |  |  |
| 3000  | 1.18E-12 | 8.24E-13 |  |  |
| 4215  | 1.22E-12 | 8.49E-13 |  |  |
| 7500  | 1.33E-12 | 9.10E-13 |  |  |

**Table S15.** Rate constants  $k$  (T, p) of the CH<sub>2</sub>OO + CH<sub>3</sub>CHO for Scheme 2a as a function of temperature and pressure by TST/Eckart method.

|          |          |          |          |          |
|----------|----------|----------|----------|----------|
| P (Torr) | 200 K    | 220 K    | 240 K    | 260 K    |
| 4.00     | 6.66E-11 | 2.35E-11 | 1.01E-11 | 5.08E-12 |
| 9.75     | 6.66E-11 | 2.36E-11 | 1.02E-11 | 5.09E-12 |
| 23.7     | 6.68E-11 | 2.36E-11 | 1.02E-11 | 5.10E-12 |
| 25       | 6.68E-11 | 2.36E-11 | 1.02E-11 | 5.10E-12 |
| 50       | 6.71E-11 | 2.37E-11 | 1.02E-11 | 5.12E-12 |
| 75       | 6.74E-11 | 2.38E-11 | 1.02E-11 | 5.13E-12 |
| 133.5    | 6.80E-11 | 2.40E-11 | 1.03E-11 | 5.16E-12 |
| 237      | 6.92E-11 | 2.43E-11 | 1.04E-11 | 5.21E-12 |
| 412.5    | 7.12E-11 | 2.49E-11 | 1.07E-11 | 5.31E-12 |
| 750      | 7.44E-11 | 2.60E-11 | 1.10E-11 | 5.47E-12 |
| 1335     | 7.93E-11 | 2.74E-11 | 1.17E-11 | 5.75E-12 |
| 2370     | 8.57E-11 | 2.94E-11 | 1.23E-11 | 6.21E-12 |
| 3000     | 8.85E-11 | 3.02E-11 | 1.26E-11 | 6.49E-12 |
| 4215     | 9.22E-11 | 3.14E-11 | 1.31E-11 | 6.34E-12 |
| 7500     | 9.61E-11 | 3.27E-11 | 1.36E-11 | 6.54E-12 |
| P (Torr) | 280 K    | 293 K    | 295 K    | 298 K    |
| 4.00     | 2.86E-12 | 2.07E-12 | 1.97E-12 | 1.84E-12 |
| 9.75     | 2.87E-12 | 2.07E-12 | 1.98E-12 | 1.84E-12 |
| 23.7     | 2.87E-12 | 2.07E-12 | 1.98E-12 | 1.85E-12 |
| 25       | 2.87E-12 | 2.07E-12 | 1.98E-12 | 1.85E-12 |
| 50       | 2.88E-12 | 2.08E-12 | 1.98E-12 | 1.85E-12 |
| 75       | 2.88E-12 | 2.08E-12 | 1.99E-12 | 1.85E-12 |
| 133.5    | 2.90E-12 | 2.09E-12 | 2.00E-12 | 1.86E-12 |
| 237      | 2.92E-12 | 2.11E-12 | 2.01E-12 | 1.88E-12 |
| 412.5    | 2.97E-12 | 2.14E-12 | 2.04E-12 | 1.90E-12 |
| 750      | 3.05E-12 | 2.19E-12 | 2.09E-12 | 1.94E-12 |
| 1335     | 3.18E-12 | 2.27E-12 | 2.17E-12 | 2.02E-12 |
| 2370     | 3.40E-12 | 2.41E-12 | 2.30E-12 | 2.14E-12 |
| 3000     | 3.53E-12 | 2.50E-12 | 2.37E-12 | 2.21E-12 |
| 4215     | 3.76E-12 | 2.65E-12 | 2.52E-12 | 2.33E-12 |
| 7500     | 3.54E-12 | 2.51E-12 | 2.38E-12 | 2.21E-12 |
| P (Torr) | 320 K    | 340 K    |          |          |

|       |          |          |  |  |
|-------|----------|----------|--|--|
| 4.00  | 9.96E-13 | 7.09E-13 |  |  |
| 9.75  | 1.00E-12 | 7.13E-13 |  |  |
| 23.7  | 1.00E-12 | 7.15E-13 |  |  |
| 25    | 1.00E-12 | 7.15E-13 |  |  |
| 50    | 1.00E-12 | 7.17E-13 |  |  |
| 75    | 1.01E-12 | 7.18E-13 |  |  |
| 133.5 | 1.01E-12 | 7.20E-13 |  |  |
| 237   | 1.02E-12 | 7.24E-13 |  |  |
| 412.5 | 1.03E-12 | 7.31E-13 |  |  |
| 750   | 1.05E-12 | 7.42E-13 |  |  |
| 1335  | 1.08E-12 | 7.62E-13 |  |  |
| 2370  | 1.13E-12 | 7.93E-13 |  |  |
| 3000  | 1.16E-12 | 8.12E-13 |  |  |
| 4215  | 1.22E-12 | 8.44E-13 |  |  |
| 7500  | 1.35E-12 | 9.22E-13 |  |  |

**Table S16.** The high-pressure limiting rate constants ( $\text{cm}^3 \text{ molecule}^{-1} \text{ s}^{-1}$ ) of the  $\text{CH}_2\text{OO} + \text{HCHO}$  reaction.

| T/K | $k_{HL}^{TSTa}$ | $\kappa_{LL}^{SCTb}$ | $\Gamma_{CVT}^{LLc}$ | $F_{act}^{MS-T,LLd}$ | $k_{1,tight}^e$ | $k_{1,loose}^f$ | $k_1^g$  |
|-----|-----------------|----------------------|----------------------|----------------------|-----------------|-----------------|----------|
| 190 | 2.96E-09        | 1.45E+00             | 0.92                 | 0.511                | 8.02E-09        | 5.13E-10        | 4.82E-10 |
| 200 | 1.43E-09        | 1.39E+00             | 0.92                 | 0.511                | 2.91E-09        | 4.99E-10        | 4.26E-10 |
| 210 | 7.46E-10        | 1.34E+00             | 0.92                 | 0.511                | 1.48E-09        | 4.85E-10        | 3.65E-10 |
| 220 | 4.13E-10        | 1.30E+00             | 0.92                 | 0.511                | 8.03E-10        | 4.72E-10        | 2.97E-10 |
| 230 | 2.41E-10        | 1.27E+00             | 0.92                 | 0.511                | 4.61E-10        | 4.59E-10        | 2.30E-10 |
| 240 | 1.47E-10        | 1.24E+00             | 0.91                 | 0.511                | 2.79E-10        | 4.46E-10        | 1.71E-10 |
| 250 | 9.40E-11        | 1.22E+00             | 0.91                 | 0.511                | 1.76E-10        | 4.33E-10        | 1.25E-10 |
| 260 | 6.22E-11        | 1.20E+00             | 0.91                 | 0.511                | 1.15E-10        | 4.21E-10        | 9.04E-11 |
| 270 | 4.25E-11        | 1.18E+00             | 0.91                 | 0.511                | 7.80E-11        | 4.11E-10        | 6.56E-11 |
| 280 | 2.99E-11        | 1.17E+00             | 0.91                 | 0.511                | 5.45E-11        | 4.02E-10        | 4.80E-11 |
| 290 | 2.16E-11        | 1.16E+00             | 0.91                 | 0.511                | 3.91E-11        | 3.94E-10        | 3.56E-11 |
| 298 | 1.70E-11        | 1.15E+00             | 0.91                 | 0.512                | 3.06E-11        | 3.88E-10        | 2.83E-11 |
| 300 | 1.60E-11        | 1.14E+00             | 0.91                 | 0.512                | 2.88E-11        | 3.86E-10        | 2.68E-11 |
| 310 | 1.21E-11        | 1.13E+00             | 0.91                 | 0.512                | 2.17E-11        | 3.82E-10        | 2.05E-11 |
| 320 | 9.31E-12        | 1.12E+00             | 0.91                 | 0.512                | 1.66E-11        | 3.79E-10        | 1.59E-11 |
| 330 | 7.30E-12        | 1.12E+00             | 0.90                 | 0.512                | 1.30E-11        | 3.73E-10        | 1.25E-11 |
| 340 | 5.81E-12        | 1.11E+00             | 0.90                 | 0.512                | 1.03E-11        | 3.73E-10        | 1.00E-11 |
| 350 | 4.70E-12        | 1.10E+00             | 0.90                 | 0.512                | 8.28E-12        | 3.67E-10        | 8.10E-12 |

<sup>a</sup>  $k_{HL}^{TST}$  is the high-level (HL) calculation by conventional transition state theory without a transmission coefficient.

<sup>b</sup>  $\kappa_{LL}^{SCT}$  is the tunneling transmission coefficient calculated by the small-curvature tunneling at LL level.

<sup>c</sup>  $\Gamma_{CVT}^{LL}$  is the recrossing transmission coefficient, which equals  $\frac{k_{LL}^{TST}}{k_{LL}^{CVT}}$ .

<sup>d</sup>  $F_{act}^{MS-T,LL}$  is the multi-structure anharmonic factor, which equals  $\frac{F_{TS}^{MS-T,M11-L/MG3S}}{F_R^{MS-T,M11-L/MG3S}}$ .

<sup>e</sup>  $k_{1,tight}$  is calculated by the dual-level strategy, which equals

$$k_{HL}^{TST}(T)\kappa_{LL}(T)\Gamma_{LL}(T)F_{fwd}^{MS-T,LL}(T).$$

<sup>f</sup>  $k_{1,loose}$  is the rate constant from reactant  $\text{CH}_2\text{OO}$  and  $\text{HCHO}$  to C1 calculated by variable-reaction-coordinate variational transition-state theory (VRC-VTST), the data obtained by the work of Long et al. (Long et al., 2021)

<sup>g</sup>  $k_1$  is high-pressure-limit rate constant, which equals  $\frac{k_{1,loose}k_{1,tight}}{k_{1,loose}+k_{1,tight}}$ .

**Table S17.** The high-pressure limiting rate constants ( $\text{cm}^3 \text{ molecule}^{-1} \text{ s}^{-1}$ ) of the  $\text{CH}_2\text{OO} + \text{CH}_3\text{CHO}$  reaction.

| T/K | $k_{HL}^{TST^a}$ | $\kappa_{LL}^{SCT^b}$ | $\Gamma_{CVT}^{LL^c}$ | $F_{act}^{MS-T,LL^d}$ | $k_2^e$  |
|-----|------------------|-----------------------|-----------------------|-----------------------|----------|
| 190 | 9.85E-11         | 1.42E+00              | 0.97                  | 0.66                  | 1.79E-10 |
| 200 | 5.34E-11         | 1.37E+00              | 0.97                  | 0.67                  | 9.49E-11 |
| 210 | 3.08E-11         | 1.33E+00              | 0.97                  | 0.68                  | 5.39E-11 |
| 220 | 1.87E-11         | 1.30E+00              | 0.97                  | 0.69                  | 3.24E-11 |
| 230 | 1.19E-11         | 1.27E+00              | 0.97                  | 0.70                  | 2.04E-11 |
| 240 | 7.90E-12         | 1.24E+00              | 0.97                  | 0.71                  | 1.34E-11 |
| 250 | 5.43E-12         | 1.22E+00              | 0.97                  | 0.72                  | 9.19E-12 |
| 260 | 3.85E-12         | 1.20E+00              | 0.96                  | 0.73                  | 6.49E-12 |
| 270 | 2.81E-12         | 1.19E+00              | 0.96                  | 0.73                  | 4.72E-12 |
| 280 | 2.10E-12         | 1.17E+00              | 0.96                  | 0.74                  | 3.52E-12 |
| 290 | 1.60E-12         | 1.16E+00              | 0.96                  | 0.75                  | 2.69E-12 |
| 293 | 1.49E-12         | 1.16E+00              | 0.96                  | 0.75                  | 2.49E-12 |
| 295 | 1.41E-12         | 1.15E+00              | 0.96                  | 0.76                  | 2.37E-12 |
| 298 | 1.31E-12         | 1.15E+00              | 0.96                  | 0.76                  | 2.20E-12 |
| 300 | 1.25E-12         | 1.15E+00              | 0.96                  | 0.76                  | 2.10E-12 |
| 310 | 9.94E-13         | 1.14E+00              | 0.96                  | 0.77                  | 1.67E-12 |
| 320 | 8.03E-13         | 1.13E+00              | 0.96                  | 0.77                  | 1.35E-12 |
| 330 | 6.58E-13         | 1.12E+00              | 0.96                  | 0.78                  | 1.10E-12 |
| 340 | 5.47E-13         | 1.11E+00              | 0.96                  | 0.79                  | 9.19E-13 |
| 350 | 4.60E-13         | 1.11E+00              | 0.96                  | 0.80                  | 7.74E-13 |

<sup>a</sup>  $k_{HL}^{TST}$  is the high-level (HL) calculation by conventional transition state theory without a transmission coefficient.

<sup>b</sup>  $\kappa_{LL}^{SCT}$  is the tunneling transmission coefficient calculated by the small-curvature tunneling at LL level.

<sup>c</sup>  $\Gamma_{CVT}^{LL}$  is the recrossing transmission coefficient, which equals  $\frac{k_{LL}^{TST}}{k_{LL}^{CVT}}$ .

<sup>d</sup>  $F_{act}^{MS-T,LL}$  is the multi-structure anharmonic factor, which equals  $\frac{F_{TS}^{MS-T,M11-L/MG3S}}{F_R^{MS-T,M11-L/MG3S}}$ .

<sup>e</sup>  $k_2$  is calculated by the dual-level strategy, which equals

$$k_{HL}^{TST}(T)\kappa_{LL}(T)\Gamma_{LL}(T)F_{fwd}^{MS-T,LL}(T).$$

**Table S18.** The high-pressure limiting rate constants ( $\text{cm}^3 \text{ molecule}^{-1} \text{ s}^{-1}$ ) of the  $\text{CH}_2\text{OO} + \text{C}_2\text{H}_5\text{CHO}$  reaction.

| T/K | $k_{HL}^{TSTa}$ | $\kappa_{LL}^{SCTb}$ | $\Gamma_{CVT}^{LLc}$ | $F_{act}^{MS-T,LLd}$ | $k_3^e$  |
|-----|-----------------|----------------------|----------------------|----------------------|----------|
| 190 | 5.63E-11        | 1.36E+00             | 0.99                 | 1.34                 | 2.04E-10 |
| 200 | 3.08E-11        | 1.32E+00             | 0.99                 | 1.35                 | 1.09E-10 |
| 210 | 1.79E-11        | 1.29E+00             | 0.99                 | 1.36                 | 6.19E-11 |
| 220 | 1.10E-11        | 1.26E+00             | 0.99                 | 1.37                 | 3.73E-11 |
| 230 | 7.03E-12        | 1.23E+00             | 0.99                 | 1.38                 | 2.35E-11 |
| 240 | 4.69E-12        | 1.21E+00             | 0.99                 | 1.38                 | 1.55E-11 |
| 250 | 3.24E-12        | 1.19E+00             | 0.99                 | 1.39                 | 1.06E-11 |
| 260 | 2.31E-12        | 1.18E+00             | 0.99                 | 1.39                 | 7.48E-12 |
| 270 | 1.69E-12        | 1.16E+00             | 0.98                 | 1.40                 | 5.43E-12 |
| 280 | 1.27E-12        | 1.15E+00             | 0.98                 | 1.40                 | 4.05E-12 |
| 290 | 9.77E-13        | 1.14E+00             | 0.98                 | 1.41                 | 3.08E-12 |
| 298 | 8.02E-13        | 1.13E+00             | 0.98                 | 1.41                 | 2.52E-12 |
| 300 | 7.65E-13        | 1.13E+00             | 0.98                 | 1.41                 | 2.40E-12 |
| 310 | 6.10E-13        | 1.12E+00             | 0.98                 | 1.42                 | 1.90E-12 |
| 320 | 4.94E-13        | 1.11E+00             | 0.98                 | 1.42                 | 1.53E-12 |
| 330 | 4.06E-13        | 1.11E+00             | 0.98                 | 1.42                 | 1.25E-12 |
| 340 | 3.38E-13        | 1.10E+00             | 0.98                 | 1.42                 | 1.04E-12 |
| 350 | 2.85E-13        | 1.09E+00             | 0.98                 | 1.43                 | 8.73E-13 |

<sup>a</sup>  $k_{HL}^{TST}$  is the high-level (HL) calculation by conventional transition state theory without a transmission coefficient.

<sup>b</sup>  $\kappa_{LL}^{SCT}$  is the tunneling transmission coefficient calculated by the small-curvature tunneling at LL level.

<sup>c</sup>  $\Gamma_{CVT}^{LL}$  is the recrossing transmission coefficient, which equals  $\frac{k_{LL}^{TST}}{k_{LL}^{CVT}}$ .

<sup>d</sup>  $F_{act}^{MS-T,LL}$  is the multi-structure anharmonic factor, which equals  $\frac{F_{TS}^{MS-T,M11-L/MG3S}}{F_R^{MS-T,M11-L/MG3S}}$ .

<sup>e</sup>  $k_3$  is calculated by the dual-level strategy, which equals

$$k_{HL}^{TST}(T)\kappa_{LL}(T)\Gamma_{LL}(T)F_{fwd}^{MS-T,LL}(T).$$

**Table S19.** The high-pressure limiting rate constants ( $\text{cm}^3 \text{ molecule}^{-1} \text{ s}^{-1}$ ) of the  $\text{CH}_2\text{OO} + \text{C}_3\text{H}_7\text{CHO}$  reaction.

| T/K | $k_{HL}^{TST}$ <sup>a</sup> | $\kappa_{LL}^{SCT}$ <sup>b</sup> | $\Gamma_{CVT}^{LL}$ <sup>c</sup> | $F_{act}^{MS-T,LL}$ <sup>d</sup> | $k_4$ <sup>e</sup> |
|-----|-----------------------------|----------------------------------|----------------------------------|----------------------------------|--------------------|
| 190 | 7.07E-11                    | 1.38E+00                         | 0.99                             | 1.14                             | 2.20E-10           |
| 200 | 3.82E-11                    | 1.33E+00                         | 0.99                             | 1.18                             | 1.19E-10           |
| 210 | 2.20E-11                    | 1.30E+00                         | 0.99                             | 1.22                             | 6.89E-11           |
| 220 | 1.33E-11                    | 1.26E+00                         | 0.99                             | 1.26                             | 4.21E-11           |
| 230 | 8.47E-12                    | 1.24E+00                         | 0.99                             | 1.29                             | 2.70E-11           |
| 240 | 5.61E-12                    | 1.22E+00                         | 0.99                             | 1.33                             | 1.81E-11           |
| 250 | 3.85E-12                    | 1.20E+00                         | 0.99                             | 1.37                             | 1.25E-11           |
| 260 | 2.72E-12                    | 1.18E+00                         | 0.99                             | 1.40                             | 8.98E-12           |
| 270 | 1.98E-12                    | 1.17E+00                         | 0.99                             | 1.44                             | 6.62E-12           |
| 280 | 1.48E-12                    | 1.15E+00                         | 1.00                             | 1.47                             | 5.00E-12           |
| 290 | 1.13E-12                    | 1.14E+00                         | 1.00                             | 1.50                             | 3.86E-12           |
| 298 | 9.25E-13                    | 1.13E+00                         | 1.00                             | 1.53                             | 3.19E-12           |
| 300 | 8.81E-13                    | 1.13E+00                         | 1.00                             | 1.54                             | 3.05E-12           |
| 310 | 6.99E-13                    | 1.12E+00                         | 1.00                             | 1.57                             | 2.45E-12           |
| 320 | 5.64E-13                    | 1.11E+00                         | 1.00                             | 1.60                             | 2.00E-12           |
| 330 | 4.62E-13                    | 1.11E+00                         | 1.00                             | 1.63                             | 1.66E-12           |
| 340 | 3.83E-13                    | 1.10E+00                         | 1.00                             | 1.66                             | 1.39E-12           |
| 350 | 3.22E-13                    | 1.09E+00                         | 1.00                             | 1.68                             | 1.18E-12           |

<sup>a</sup>  $k_{HL}^{TST}$  is the high-level (HL) calculation by conventional transition state theory without a transmission coefficient.

<sup>b</sup>  $\kappa_{LL}^{SCT}$  is the tunneling transmission coefficient calculated by the small-curvature tunneling at LL level.

<sup>c</sup>  $\Gamma_{CVT}^{LL}$  is the recrossing transmission coefficient, which equals  $\frac{k_{LL}^{TST}}{k_{LL}^{CVT}}$ .

<sup>d</sup>  $F_{act}^{MS-T,LL}$  is the multi-structure anharmonic factor, which equals  $\frac{F_{TS}^{MS-T,M11-L/MG3S}}{F_R^{MS-T,M11-L/MG3S}}$ .

<sup>e</sup>  $k_4$  is calculated by the dual-level strategy, which equals

$$k_{HL}^{TST}(T) \kappa_{LL}(T) \Gamma_{LL}(T) F_{\text{fwd}}^{MS-T,LL}(T).$$

**Table S20.** The high-pressure limiting rate constants ( $\text{cm}^3 \text{ molecule}^{-1} \text{ s}^{-1}$ ) of the  $\text{CH}_2\text{OO} + \text{C}_4\text{H}_9\text{CHO}$  reaction.

| T/K | $k_{HL}^{TSTa}$ | $\kappa_{LL}^{SCTb}$ | $\Gamma_{CVT}^{LLc}$ | $F_{act}^{MS-T,LLd}$ | $k_5^e$  |
|-----|-----------------|----------------------|----------------------|----------------------|----------|
| 190 | 8.30E-11        | 1.35E+00             | 0.99                 | 0.93                 | 2.08E-10 |
| 200 | 4.46E-11        | 1.31E+00             | 0.99                 | 0.95                 | 1.10E-10 |
| 210 | 2.55E-11        | 1.28E+00             | 0.99                 | 0.96                 | 6.21E-11 |
| 220 | 1.54E-11        | 1.25E+00             | 0.99                 | 0.97                 | 3.71E-11 |
| 230 | 9.76E-12        | 1.22E+00             | 0.99                 | 0.99                 | 2.33E-11 |
| 240 | 6.43E-12        | 1.20E+00             | 0.99                 | 1.00                 | 1.53E-11 |
| 250 | 4.40E-12        | 1.18E+00             | 0.99                 | 1.01                 | 1.04E-11 |
| 260 | 3.10E-12        | 1.17E+00             | 0.99                 | 0.97                 | 6.95E-12 |
| 270 | 2.25E-12        | 1.16E+00             | 0.99                 | 0.98                 | 5.03E-12 |
| 280 | 1.68E-12        | 1.14E+00             | 0.99                 | 0.99                 | 3.74E-12 |
| 290 | 1.28E-12        | 1.13E+00             | 0.99                 | 0.99                 | 2.85E-12 |
| 298 | 1.04E-12        | 1.12E+00             | 0.99                 | 1.01                 | 2.34E-12 |
| 300 | 9.92E-13        | 1.12E+00             | 0.99                 | 1.04                 | 2.28E-12 |
| 310 | 7.85E-13        | 1.11E+00             | 0.99                 | 1.01                 | 1.75E-12 |
| 320 | 6.32E-13        | 1.11E+00             | 0.99                 | 1.02                 | 1.41E-12 |
| 330 | 5.16E-13        | 1.10E+00             | 0.99                 | 1.02                 | 1.15E-12 |
| 340 | 4.27E-13        | 1.09E+00             | 0.99                 | 1.03                 | 9.51E-13 |
| 350 | 3.58E-13        | 1.09E+00             | 0.99                 | 1.03                 | 7.97E-13 |

<sup>a</sup>  $k_{HL}^{TST}$  is the high-level (HL) calculation by conventional transition state theory without a transmission coefficient.

<sup>b</sup>  $\kappa_{LL}^{SCT}$  is the tunneling transmission coefficient calculated by the small-curvature tunneling at LL level.

<sup>c</sup>  $\Gamma_{CVT}^{LL}$  is the recrossing transmission coefficient, which equals  $\frac{k_{LL}^{TST}}{k_{LL}^{CVT}}$ .

<sup>d</sup>  $F_{act}^{MS-T,LL}$  is the multi-structure anharmonic factor, which equals  $\frac{F_{TS}^{MS-T,M11-L/MG3S}}{F_R^{MS-T,M11-L/MG3S}}$ .

<sup>e</sup>  $k_5$  is calculated by the dual-level strategy, which equals

$$k_{HL}^{TST}(T)\kappa_{LL}(T)\Gamma_{LL}(T)F_{fwd}^{MS-T,LL}(T).$$

**Table S21.** The high-pressure limiting rate constants ( $\text{cm}^3 \text{ molecule}^{-1} \text{ s}^{-1}$ ) of the  $\text{CH}_2\text{OO} + \text{C}_5\text{H}_{11}\text{CHO}$  reaction.

| T/K | $k_{HL}^{TSTa}$ | $\kappa_{LL}^{SCTb}$ | $\Gamma_{CVT}^{LLc}$ | $F_{act}^{MS-T,LLd}$ | $k_6^e$  |
|-----|-----------------|----------------------|----------------------|----------------------|----------|
| 190 | 1.16E-10        | 1.43E+00             | 0.90                 | 1.37                 | 4.09E-10 |
| 200 | 6.18E-11        | 1.36E+00             | 0.90                 | 1.41                 | 2.14E-10 |
| 210 | 3.50E-11        | 1.31E+00             | 0.90                 | 1.46                 | 1.21E-10 |
| 220 | 2.09E-11        | 1.27E+00             | 0.90                 | 1.50                 | 7.19E-11 |
| 230 | 1.31E-11        | 1.24E+00             | 0.90                 | 1.54                 | 4.51E-11 |
| 240 | 8.59E-12        | 1.21E+00             | 0.89                 | 1.58                 | 2.95E-11 |
| 250 | 5.83E-12        | 1.19E+00             | 0.89                 | 1.62                 | 2.01E-11 |
| 260 | 4.08E-12        | 1.17E+00             | 0.89                 | 1.54                 | 1.31E-11 |
| 270 | 2.95E-12        | 1.16E+00             | 0.89                 | 1.57                 | 9.53E-12 |
| 280 | 2.18E-12        | 1.14E+00             | 0.89                 | 1.60                 | 7.09E-12 |
| 290 | 1.65E-12        | 1.13E+00             | 0.88                 | 1.63                 | 5.40E-12 |
| 298 | 1.34E-12        | 1.12E+00             | 0.88                 | 1.67                 | 4.46E-12 |
| 300 | 1.28E-12        | 1.12E+00             | 0.88                 | 1.74                 | 4.41E-12 |
| 310 | 1.01E-12        | 1.11E+00             | 0.88                 | 1.68                 | 3.32E-12 |
| 320 | 8.08E-13        | 1.10E+00             | 0.88                 | 1.71                 | 2.67E-12 |
| 330 | 6.57E-13        | 1.10E+00             | 0.87                 | 1.73                 | 2.18E-12 |
| 340 | 5.42E-13        | 1.09E+00             | 0.87                 | 1.75                 | 1.80E-12 |
| 350 | 4.53E-13        | 1.08E+00             | 0.87                 | 1.77                 | 1.51E-12 |

<sup>a</sup>  $k_{HL}^{TST}$  is the high-level (HL) calculation by conventional transition state theory without a transmission coefficient.

<sup>b</sup>  $\kappa_{LL}^{SCT}$  is the tunneling transmission coefficient calculated by the small-curvature tunneling at LL level.

<sup>c</sup>  $\Gamma_{CVT}^{LL}$  is the recrossing transmission coefficient, which equals  $\frac{k_{LL}^{TST}}{k_{LL}^{CVT}}$ .

<sup>d</sup>  $F_{act}^{MS-T,LL}$  is the multi-structure anharmonic factor, which equals  $\frac{F_{TS}^{MS-T,M11-L/MG3S}}{F_R^{MS-T,M11-L/MG3S}}$ .

<sup>e</sup>  $k_6$  is calculated by the dual-level strategy, which equals

$$k_{HL}^{TST}(T)\kappa_{LL}(T)\Gamma_{LL}(T)F_{fwd}^{MS-T,LL}(T).$$

**Table S22.** The high-pressure limiting rate constants ( $\text{cm}^3 \text{ molecule}^{-1} \text{ s}^{-1}$ ) of the  $\text{CH}_2\text{OO} + \text{CH}_2\text{FCHO}$  reaction.

| T/K | $k_{HL}^{TST}$ | $\kappa_{LL}^{SCT}$ | $\Gamma_{CVT}^{LL}$ | $F_{act}^{MS-T,LL}$ | $k_{7,tight}$ | $k_{7,loose}$ | $k_7$    |
|-----|----------------|---------------------|---------------------|---------------------|---------------|---------------|----------|
| 190 | 2.53E-09       | 1.36E+00            | 0.96                | 0.76                | 5.05E-09      | 5.70E-10      | 5.12E-10 |
| 200 | 1.08E-09       | 1.32E+00            | 0.96                | 0.79                | 2.16E-09      | 5.37E-10      | 4.30E-10 |
| 210 | 5.03E-10       | 1.29E+00            | 0.96                | 0.81                | 1.00E-09      | 5.10E-10      | 3.38E-10 |
| 220 | 2.51E-10       | 1.26E+00            | 0.96                | 0.83                | 5.06E-10      | 4.86E-10      | 2.48E-10 |
| 230 | 1.34E-10       | 1.23E+00            | 0.96                | 0.86                | 2.72E-10      | 4.66E-10      | 1.72E-10 |
| 240 | 7.51E-11       | 1.21E+00            | 0.96                | 0.89                | 1.55E-10      | 4.49E-10      | 1.15E-10 |
| 250 | 4.43E-11       | 1.19E+00            | 0.96                | 0.92                | 9.28E-11      | 4.34E-10      | 7.65E-11 |
| 260 | 2.73E-11       | 1.18E+00            | 0.96                | 0.94                | 5.82E-11      | 4.22E-10      | 5.11E-11 |
| 270 | 1.75E-11       | 1.16E+00            | 0.96                | 0.97                | 3.79E-11      | 4.10E-10      | 3.47E-11 |
| 280 | 1.16E-11       | 1.15E+00            | 0.96                | 1.00                | 2.55E-11      | 4.00E-10      | 2.40E-11 |
| 290 | 7.89E-12       | 1.14E+00            | 0.96                | 1.03                | 1.78E-11      | 3.92E-10      | 1.70E-11 |
| 298 | 5.93E-12       | 1.13E+00            | 0.95                | 1.06                | 1.36E-11      | 3.85E-10      | 1.31E-11 |
| 300 | 5.54E-12       | 1.13E+00            | 0.95                | 1.07                | 1.27E-11      | 3.84E-10      | 1.23E-11 |
| 310 | 3.98E-12       | 1.12E+00            | 0.95                | 1.10                | 9.35E-12      | 3.77E-10      | 9.13E-12 |
| 320 | 2.93E-12       | 1.11E+00            | 0.95                | 1.13                | 7.03E-12      | 3.71E-10      | 6.90E-12 |
| 330 | 2.20E-12       | 1.11E+00            | 0.95                | 1.17                | 5.39E-12      | 3.65E-10      | 5.31E-12 |
| 340 | 1.68E-12       | 1.10E+00            | 0.95                | 1.20                | 4.21E-12      | 3.60E-10      | 4.17E-12 |
| 350 | 1.31E-12       | 1.09E+00            | 0.95                | 1.23                | 3.35E-12      | 3.55E-10      | 3.32E-12 |

<sup>a</sup>  $k_{HL}^{TST}$  is the high-level (HL) calculation by conventional transition state theory without a transmission coefficient.

<sup>b</sup>  $\kappa_{LL}^{SCT}$  is the tunneling transmission coefficient calculated by the small-curvature tunneling at LL level.

<sup>c</sup>  $\Gamma_{CVT}^{LL}$  is the recrossing transmission coefficient, which equals  $\frac{k_{LL}^{TST}}{k_{LL}^{CVT}}$ .

<sup>d</sup>  $F_{act}^{MS-T,LL}$  is the multi-structure anharmonic factor, which equals  $\frac{F_{TS}^{MS-T,M11-L/MG3S}}{F_R^{MS-T,M11-L/MG3S}}$ .

<sup>e</sup>  $k_{7,tight}$  is calculated by the dual-level strategy, which equals

$$k_{HL}^{TST}(T) \kappa_{LL}(T) \Gamma_{LL}(T) F_{fwd}^{MS-T,LL}(T).$$

<sup>f</sup>  $k_{7,loose}$  is the rate constant from reactant  $\text{CH}_2\text{OO}$  and  $\text{HCHO}$  to C1 calculated by variable-reaction-coordinate variational transition-state theory (VRC-VTST).

<sup>g</sup>  $k_7$  is high-pressure-limit rate constant, which equals  $\frac{k_{7,loose} k_{7,tight}}{k_{7,loose} + k_{7,tight}}$ .

**Table S23.** The high-pressure limiting rate constants ( $\text{cm}^3 \text{ molecule}^{-1} \text{ s}^{-1}$ ) of the  $\text{CH}_2\text{OO} + \text{CHF}_2\text{CHO}$  reaction.

| T/K | $k_{HL}^{TST}$ | $\kappa_{LL}^{SCT}$ | $\Gamma_{CVT}^{LL}$ | $F_{act}^{MS-T,LL}$ | $k_{8,tight}$ | $k_{8,loose}$ | $k_8$    |
|-----|----------------|---------------------|---------------------|---------------------|---------------|---------------|----------|
| 190 | 2.04E-07       | 1.24E+00            | 0.92                | 1.55                | 7.22E-07      | 4.63E-10      | 4.62E-10 |
| 200 | 7.01E-08       | 1.21E+00            | 0.92                | 1.60                | 2.50E-07      | 4.52E-10      | 4.51E-10 |
| 210 | 2.68E-08       | 1.19E+00            | 0.92                | 1.64                | 9.64E-08      | 4.35E-10      | 4.33E-10 |
| 220 | 1.12E-08       | 1.17E+00            | 0.92                | 1.68                | 4.07E-08      | 4.20E-10      | 4.16E-10 |
| 230 | 5.07E-09       | 1.16E+00            | 0.92                | 1.72                | 1.86E-08      | 4.08E-10      | 3.99E-10 |
| 240 | 2.46E-09       | 1.14E+00            | 0.92                | 1.76                | 9.15E-09      | 3.97E-10      | 3.81E-10 |
| 250 | 1.27E-09       | 1.13E+00            | 0.92                | 1.81                | 4.78E-09      | 3.88E-10      | 3.59E-10 |
| 260 | 6.89E-10       | 1.12E+00            | 0.92                | 1.85                | 2.63E-09      | 3.75E-10      | 3.28E-10 |
| 270 | 3.92E-10       | 1.11E+00            | 0.92                | 1.89                | 1.52E-09      | 3.61E-10      | 2.92E-10 |
| 280 | 2.33E-10       | 1.10E+00            | 0.92                | 1.93                | 9.17E-10      | 3.48E-10      | 2.52E-10 |
| 290 | 1.44E-10       | 1.10E+00            | 0.92                | 1.97                | 5.74E-10      | 3.38E-10      | 2.13E-10 |
| 298 | 1.01E-10       | 1.09E+00            | 0.92                | 2.01                | 4.05E-10      | 3.30E-10      | 1.82E-10 |
| 300 | 9.22E-11       | 1.09E+00            | 0.92                | 2.02                | 3.72E-10      | 3.28E-10      | 1.74E-10 |
| 310 | 6.08E-11       | 1.08E+00            | 0.92                | 2.06                | 2.49E-10      | 3.19E-10      | 1.40E-10 |
| 320 | 4.12E-11       | 1.08E+00            | 0.92                | 2.10                | 1.71E-10      | 3.12E-10      | 1.10E-10 |
| 330 | 2.87E-11       | 1.07E+00            | 0.92                | 2.14                | 1.21E-10      | 3.05E-10      | 8.65E-11 |
| 340 | 2.04E-11       | 1.07E+00            | 0.92                | 2.18                | 8.71E-11      | 2.99E-10      | 6.74E-11 |
| 350 | 1.48E-11       | 1.06E+00            | 0.92                | 2.22                | 6.42E-11      | 2.93E-10      | 5.27E-11 |

<sup>a</sup>  $k_{HL}^{TST}$  is the high-level (HL) calculation by conventional transition state theory without a transmission coefficient.

<sup>b</sup>  $\kappa_{LL}^{SCT}$  is the tunneling transmission coefficient calculated by the small-curvature tunneling at LL level.

<sup>c</sup>  $\Gamma_{CVT}^{LL}$  is the recrossing transmission coefficient, which equals  $\frac{k_{LL}^{TST}}{k_{LL}^{CVT}}$ .

<sup>d</sup>  $F_{act}^{MS-T,LL}$  is the multi-structure anharmonic factor, which equals  $\frac{F_{TS}^{MS-T,M11-L/MG3S}}{F_R^{MS-T,M11-L/MG3S}}$ .

<sup>e</sup>  $k_{8,tight}$  is calculated by the dual-level strategy, which equals

$$k_{HL}^{TST}(T)\kappa_{LL}(T)\Gamma_{LL}(T)F_{fwd}^{MS-T,LL}(T).$$

<sup>f</sup>  $k_{8,loose}$  is the rate constant from reactant  $\text{CH}_2\text{OO}$  and  $\text{HCHO}$  to C1 calculated by variable-reaction-coordinate variational transition-state theory (VRC-VTST).

<sup>g</sup>  $k_8$  is high-pressure-limit rate constant, which equals  $\frac{k_{8,loose}k_{8,tight}}{k_{8,loose}+k_{8,tight}}$ .

**Table S24.** The high-pressure limiting rate constants ( $\text{cm}^3 \text{ molecule}^{-1} \text{ s}^{-1}$ ) of the  $\text{CH}_2\text{OO} + \text{CF}_3\text{CHO}$  reaction.

| T/K | $k_9$    |
|-----|----------|
| 190 | 7.73E-10 |
| 200 | 7.40E-10 |
| 210 | 7.11E-10 |
| 220 | 6.88E-10 |
| 230 | 6.68E-10 |
| 240 | 6.52E-10 |
| 250 | 6.38E-10 |
| 260 | 6.26E-10 |
| 270 | 6.15E-10 |
| 280 | 6.07E-10 |
| 290 | 5.99E-10 |
| 298 | 5.94E-10 |
| 300 | 5.93E-10 |
| 310 | 5.88E-10 |
| 320 | 5.83E-10 |
| 330 | 5.79E-10 |
| 340 | 5.76E-10 |
| 350 | 5.74E-10 |

**Table S25.** Fitting Parameters for all aldehydes.

|                                    | A                      | n     | E      | T <sub>0</sub> |
|------------------------------------|------------------------|-------|--------|----------------|
| HCHO                               | $1.21 \times 10^{-33}$ | 27.94 | -41.78 | -50.70         |
| CH <sub>3</sub> CHO                | $6.87 \times 10^{-16}$ | 1.51  | -4.12  | 47.25          |
| C <sub>2</sub> H <sub>5</sub> CHO  | $1.36 \times 10^{-13}$ | -4.05 | -0.50  | -137.77        |
| C <sub>3</sub> H <sub>7</sub> CHO  | $1.19 \times 10^{-15}$ | 1.62  | -4.07  | 41.13          |
| C <sub>4</sub> H <sub>9</sub> CHO  | $2.93 \times 10^{-16}$ | 2.23  | -4.33  | 66.75          |
| C <sub>5</sub> H <sub>11</sub> CHO | $6.79 \times 10^{-16}$ | 2.03  | -4.30  | 61.81          |
| CH <sub>2</sub> FCHO               | $2.80 \times 10^{-41}$ | 39.97 | -54.76 | -48.01         |
| CHF <sub>2</sub> CHO               | $4.14 \times 10^{-18}$ | -5.74 | -20.16 | -149.52        |
| CF <sub>3</sub> CHO                | $8.08 \times 10^{-10}$ | -0.03 | 0.58   | -166.04        |

**Table S26.** The rate constant for the conversion of C2b.

| T   | k <sub>C2b-TS2b</sub> | k <sub>C2b-TSISO</sub> |
|-----|-----------------------|------------------------|
| 190 | 6.82E+08              | 3.78E+10               |
| 200 | 9.03E+08              | 5.56E+10               |
| 210 | 1.16E+09              | 7.88E+10               |
| 220 | 1.45E+09              | 1.08E+11               |
| 230 | 1.79E+09              | 1.45E+11               |
| 240 | 2.15E+09              | 1.90E+11               |
| 250 | 2.55E+09              | 2.44E+11               |
| 260 | 2.98E+09              | 3.07E+11               |
| 270 | 3.44E+09              | 3.80E+11               |
| 280 | 3.92E+09              | 4.63E+11               |
| 290 | 4.43E+09              | 5.57E+11               |
| 298 | 4.85E+09              | 6.41E+11               |
| 300 | 4.96E+09              | 6.63E+11               |
| 310 | 5.51E+09              | 7.80E+11               |
| 320 | 6.07E+09              | 9.09E+11               |
| 330 | 6.65E+09              | 1.05E+12               |
| 340 | 7.25E+09              | 1.20E+12               |
| 350 | 7.85E+09              | 1.37E+12               |

**Table S27.** Rate ratio  $v_i$  between the reaction R2-R4 and OH + CH<sub>3</sub>CHO/C<sub>2</sub>H<sub>5</sub>CHO with different concentrations of OH and CH<sub>2</sub>OO at different heights from different region in GEOS-Chem

| Height       | T/K   | P/mBar | [CH <sub>2</sub> OO] <sup>a</sup> | [OH] <sup>a</sup>  | [CH <sub>2</sub> OO]/[OH] <sup>a</sup> | $v_2^a$  | $v_3^b$  |
|--------------|-------|--------|-----------------------------------|--------------------|----------------------------------------|----------|----------|
| Gansu, China |       |        |                                   |                    |                                        |          |          |
| 1            | 290.2 | 1013   | 2.18                              | $8.77 \times 10^3$ | $2.48 \times 10^{-4}$                  | 4.22E-05 | 4.16E-05 |
| 5            | 250.5 | 495.9  | 6.99                              | $2.26 \times 10^4$ | $3.09 \times 10^{-4}$                  | 1.52E-04 | 1.71E-04 |
| 10           | 215.6 | 242.8  | 0.85                              | $2.42 \times 10^4$ | $3.51 \times 10^{-5}$                  | 6.24E-05 | 8.31E-05 |
| Russia       |       |        |                                   |                    |                                        |          |          |
| 1            | 290.2 | 1013   | $8.93 \times 10^2$                | $5.88 \times 10^4$ | $1.52 \times 10^{-2}$                  | 2.58E-03 | 2.54E-03 |
| 5            | 250.5 | 495.9  | $2.25 \times 10^2$                | $3.52 \times 10^4$ | $6.39 \times 10^{-3}$                  | 3.14E-03 | 3.54E-03 |
| 10           | 215.6 | 242.8  | 2.69                              | $8.33 \times 10^4$ | $3.23 \times 10^{-5}$                  | 5.73E-05 | 7.64E-05 |
| Arctic       |       |        |                                   |                    |                                        |          |          |
| 1            | 290.2 | 1013   | $1.96 \times 10^3$                | $1.71 \times 10^5$ | $1.15 \times 10^{-2}$                  | 1.95E-03 | 1.92E-03 |
| 5            | 250.5 | 495.9  | $3.55 \times 10^1$                | $6.89 \times 10^4$ | $5.16 \times 10^{-4}$                  | 2.53E-04 | 2.86E-04 |
| 10           | 215.6 | 242.8  | 0.894                             | $4.68 \times 10^5$ | $1.91 \times 10^{-6}$                  | 3.39E-06 | 4.52E-06 |
| Indonesia    |       |        |                                   |                    |                                        |          |          |
| 1            | 290.2 | 1013   | $2.18 \times 10^2$                | $6.90 \times 10^4$ | $3.16 \times 10^{-3}$                  | 5.36E-04 | 5.29E-04 |
| 5            | 250.5 | 495.9  | $8.08 \times 10^1$                | $1.38 \times 10^4$ | $5.85 \times 10^{-3}$                  | 2.87E-03 | 3.24E-03 |
| 10           | 215.6 | 242.8  | 207.51                            | $8.19 \times 10^3$ | $2.53 \times 10^{-2}$                  | 4.50E-02 | 5.99E-02 |

<sup>a</sup> the product of rate ratio and concentration ratio of reaction R2.

<sup>b</sup> the product of rate ratio and concentration ratio of reaction R3.

**Table S28.** Rate ratio  $v_i$  between the reaction R4-R5 and OH + C<sub>3</sub>H<sub>7</sub>CHO/C<sub>4</sub>H<sub>9</sub>CHO with different concentrations of OH and CH<sub>2</sub>OO at different heights from different region in GEOS-Chem

| Height       | T/K   | P/mBar | [CH <sub>2</sub> OO] <sup>a</sup> | [OH] <sup>a</sup>  | [CH <sub>2</sub> OO]/[OH] <sup>a</sup> | $v_4^a$  | $v_5^b$  |
|--------------|-------|--------|-----------------------------------|--------------------|----------------------------------------|----------|----------|
| Gansu, China |       |        |                                   |                    |                                        |          |          |
| 1            | 290.2 | 1013   | 2.18                              | $8.77 \times 10^3$ | $2.48 \times 10^{-4}$                  | 3.90E-05 | 2.64E-05 |
| 5            | 250.5 | 495.9  | 6.99                              | $2.26 \times 10^4$ | $3.09 \times 10^{-4}$                  | 1.55E-04 | 1.15E-04 |
| 10           | 215.6 | 242.8  | 0.85                              | $2.42 \times 10^4$ | $3.51 \times 10^{-5}$                  | 7.43E-05 | 6.02E-05 |
| Russia       |       |        |                                   |                    |                                        |          |          |
| 1            | 290.2 | 1013   | $8.93 \times 10^2$                | $5.88 \times 10^4$ | $1.52 \times 10^{-2}$                  | 2.39E-03 | 1.61E-03 |
| 5            | 250.5 | 495.9  | $2.25 \times 10^2$                | $3.52 \times 10^4$ | $6.39 \times 10^{-3}$                  | 3.21E-03 | 2.37E-03 |
| 10           | 215.6 | 242.8  | 2.69                              | $8.33 \times 10^4$ | $3.23 \times 10^{-5}$                  | 6.83E-05 | 5.54E-05 |
| Arctic       |       |        |                                   |                    |                                        |          |          |
| 1            | 290.2 | 1013   | $1.96 \times 10^3$                | $1.71 \times 10^5$ | $1.15 \times 10^{-2}$                  | 1.80E-03 | 1.22E-03 |
| 5            | 250.5 | 495.9  | $3.55 \times 10^1$                | $6.89 \times 10^4$ | $5.16 \times 10^{-4}$                  | 2.59E-04 | 1.91E-04 |
| 10           | 215.6 | 242.8  | 0.894                             | $4.68 \times 10^5$ | $1.91 \times 10^{-6}$                  | 4.04E-06 | 3.27E-06 |
| Indonesia    |       |        |                                   |                    |                                        |          |          |
| 1            | 290.2 | 1013   | $2.18 \times 10^2$                | $6.90 \times 10^4$ | $3.16 \times 10^{-3}$                  | 4.96E-04 | 3.35E-04 |
| 5            | 250.5 | 495.9  | $8.08 \times 10^1$                | $1.38 \times 10^4$ | $5.85 \times 10^{-3}$                  | 2.94E-03 | 2.17E-03 |
| 10           | 215.6 | 242.8  | 207.51                            | $8.19 \times 10^3$ | $2.53 \times 10^{-2}$                  | 5.36E-02 | 4.34E-02 |

<sup>a</sup> the product of rate ratio and concentration ratio of reaction R4

<sup>b</sup> the product of rate ratio and concentration ratio of reaction R5

**Table S29.** Rate ratio  $v_i$  between the reaction R6-R7 and OH + C<sub>4</sub>H<sub>9</sub>CHO/C<sub>5</sub>H<sub>11</sub>CHO with different concentrations of OH and CH<sub>2</sub>OO at different heights from different region in GEOS-Chem

| Height       | T/K   | P/mBar | [CH <sub>2</sub> OO] <sup>a</sup> | [OH] <sup>a</sup>  | [CH <sub>2</sub> OO]/[OH] <sup>a</sup> | $v_6^a$  | $v_7^b$  |
|--------------|-------|--------|-----------------------------------|--------------------|----------------------------------------|----------|----------|
| Gansu, China |       |        |                                   |                    |                                        |          |          |
| 1            | 290.2 | 1013   | 2.18                              | $8.77 \times 10^3$ | $2.48 \times 10^{-4}$                  | 4.72E-05 | 1.70E-03 |
| 5            | 250.5 | 495.9  | 6.99                              | $2.26 \times 10^4$ | $3.09 \times 10^{-4}$                  | 2.07E-04 | 9.31E-03 |
| 10           | 215.6 | 242.8  | 0.85                              | $2.42 \times 10^4$ | $3.51 \times 10^{-5}$                  | 1.10E-04 | 3.98E-03 |
| Russia       |       |        |                                   |                    |                                        |          |          |
| 1            | 290.2 | 1013   | $8.93 \times 10^2$                | $5.88 \times 10^4$ | $1.52 \times 10^{-2}$                  | 2.88E-03 | 1.04E-01 |
| 5            | 250.5 | 495.9  | $2.25 \times 10^2$                | $3.52 \times 10^4$ | $6.39 \times 10^{-3}$                  | 4.27E-03 | 1.93E-01 |
| 10           | 215.6 | 242.8  | 2.69                              | $8.33 \times 10^4$ | $3.23 \times 10^{-5}$                  | 1.01E-04 | 3.66E-03 |
| Arctic       |       |        |                                   |                    |                                        |          |          |
| 1            | 290.2 | 1013   | $1.96 \times 10^3$                | $1.71 \times 10^5$ | $1.15 \times 10^{-2}$                  | 2.18E-03 | 7.86E-02 |
| 5            | 250.5 | 495.9  | $3.55 \times 10^1$                | $6.89 \times 10^4$ | $5.16 \times 10^{-4}$                  | 3.44E-04 | 1.55E-02 |
| 10           | 215.6 | 242.8  | 0.894                             | $4.68 \times 10^5$ | $1.91 \times 10^{-6}$                  | 5.97E-06 | 2.16E-04 |
| Indonesia    |       |        |                                   |                    |                                        |          |          |
| 1            | 290.2 | 1013   | $2.18 \times 10^2$                | $6.90 \times 10^4$ | $3.16 \times 10^{-3}$                  | 5.99E-04 | 2.16E-02 |
| 5            | 250.5 | 495.9  | $8.08 \times 10^1$                | $1.38 \times 10^4$ | $5.85 \times 10^{-3}$                  | 3.91E-03 | 1.76E-01 |
| 10           | 215.6 | 242.8  | 207.51                            | $8.19 \times 10^3$ | $2.53 \times 10^{-2}$                  | 7.92E-02 | 2.87E+00 |

<sup>a</sup> the product of rate ratio and concentration ratio of reaction R6.

<sup>b</sup> the product of rate ratio and concentration ratio of reaction R7.

**Table S30.** The fitting rate constants of reactions in the GEOS-Chem.

| Reaction                                             | Rate                                                   |
|------------------------------------------------------|--------------------------------------------------------|
| HCHO + CH <sub>2</sub> OO = HCHO + HCOOH             | $3.47 \times 10^{-6} (300/T)^{-20.8} \exp(-3492.36/T)$ |
| ALD2 + CH <sub>2</sub> OO = ACTA + CH <sub>2</sub> O | $1.44 \times 10^{-16} (300/T)^{-2.42} \exp(2879.01/T)$ |

**Table S31.** Absolute energies (Hartree) and the Cartesian coordinates (Å) of the optimized geometries calculated by M11-L/MG3S.

| species            | Cartesian coordinates |             |             |             |
|--------------------|-----------------------|-------------|-------------|-------------|
| CH <sub>2</sub> OO | C                     | 1.04396000  | 0.19587400  | 0.00000000  |
|                    | O                     | -0.00960700 | -0.45046800 | 0.00000000  |
|                    | O                     | -1.14305300 | 0.19299600  | 0.00000000  |
|                    | H                     | 1.00387900  | 1.28953700  | 0.00000000  |
|                    | H                     | 1.95364300  | -0.40500300 | -0.00000100 |
| HCHO               | O                     | 0.00000000  | 0.00000000  | 0.66285600  |
|                    | C                     | 0.00000000  | 0.00000000  | -0.51031800 |
|                    | H                     | 0.00000000  | 0.94465300  | -1.12046900 |
|                    | H                     | 0.00000000  | -0.94465300 | -1.12046900 |
| C                  | C                     | 1.11477600  | -0.91532000 | 0.22752100  |
|                    | O                     | 1.18444100  | 0.15003800  | -0.38744800 |
|                    | O                     | 0.61155600  | 1.19828200  | 0.18849400  |
|                    | H                     | 0.68485400  | -0.94239600 | 1.23157000  |
|                    | H                     | 1.54042600  | -1.77681500 | -0.29207000 |
|                    | O                     | -1.32203900 | -0.81598900 | -0.09680800 |
|                    | C                     | -1.54835000 | 0.34827000  | -0.00310400 |
|                    | H                     | -1.66378900 | 1.01206400  | -0.89472100 |
|                    | H                     | -1.75171600 | 0.85078700  | 0.97481200  |
| TS                 | C                     | 0.95615400  | -0.87487200 | 0.28938300  |
|                    | O                     | 1.13473400  | 0.15210800  | -0.38038900 |
|                    | O                     | 0.47517800  | 1.20832700  | 0.12322200  |
|                    | H                     | 0.59165000  | -0.80576300 | 1.31588000  |
|                    | H                     | 1.35262400  | -1.79456800 | -0.14898100 |
|                    | O                     | -1.11677700 | -0.82571700 | -0.21772500 |
|                    | C                     | -1.38925600 | 0.31504300  | 0.07627400  |
|                    | H                     | -1.73284900 | 1.04247700  | -0.69114600 |
|                    | H                     | -1.55789400 | 0.63908400  | 1.12944300  |
| P                  | C                     | 1.07975400  | 0.30692500  | -0.13360000 |
|                    | O                     | 0.64058000  | -0.91620200 | 0.30138100  |
|                    | O                     | -0.64058700 | -0.91619800 | -0.30138300 |
|                    | H                     | 1.41279900  | 0.27194400  | -1.19103900 |
|                    | H                     | 1.91051600  | 0.60830300  | 0.52538800  |
|                    | O                     | 0.00000300  | 1.15194400  | -0.00000200 |
|                    | C                     | -1.07975200 | 0.30693000  | 0.13360300  |
|                    | H                     | -1.41278800 | 0.27194800  | 1.19104500  |
|                    | H                     | -1.91051500 | 0.60831600  | -0.52537700 |
| TS11               | C                     | 1.14125400  | 0.27316500  | 0.22422300  |
|                    | O                     | 1.01202700  | -0.82733200 | -0.35895900 |
|                    | O                     | -0.86028800 | -0.90281300 | 0.30378400  |
|                    | H                     | 1.85421600  | 0.97843400  | -0.25944800 |
|                    | H                     | 1.24591100  | 0.30841600  | 1.33351500  |
|                    | O                     | -0.16852000 | 1.13965000  | 0.00701800  |
|                    | C                     | -1.04723800 | 0.24817100  | -0.23676500 |
|                    | H                     | -1.92234600 | -0.02716500 | 0.58275000  |
|                    | H                     | -1.60762700 | 0.33626200  | -1.19630500 |
| HCOOH              | O                     | 1.09271100  | -0.09062500 | 0.00000000  |
|                    | O                     | -1.11319600 | -0.25603700 | 0.00000000  |
|                    | C                     | -0.12835400 | 0.38709500  | 0.00000000  |

|        |   |             |             |             |
|--------|---|-------------|-------------|-------------|
|        | H | 1.01707900  | -1.04748000 | 0.00000000  |
|        | H | -0.08307100 | 1.49820800  | 0.00000000  |
| TS21   | C | 0.00000000  | 1.10650500  | 0.27278600  |
|        | O | 0.56011000  | 0.88852200  | -0.87590500 |
|        | O | -0.56011000 | -0.88852200 | -0.87590500 |
|        | H | -1.03331700 | 1.52052300  | 0.19200700  |
|        | H | 0.59712400  | 1.90376100  | 0.77850600  |
|        | O | 0.00000000  | 0.00000000  | 1.10000200  |
|        | C | 0.00000000  | -1.10650500 | 0.27278600  |
|        | H | 1.03331700  | -1.52052300 | 0.19200700  |
|        | H | -0.59712400 | -1.90376100 | 0.77850600  |
| P21    | C | -0.88991300 | 0.32565800  | 0.00000100  |
|        | O | -2.13161400 | 0.04532700  | 0.00000100  |
|        | O | 1.61017800  | 0.79453700  | -0.00000200 |
|        | H | -0.63250200 | 1.00682700  | 0.86106700  |
|        | H | -0.63251000 | 1.00682900  | -0.86106700 |
|        | O | -0.05370000 | -0.76510900 | -0.00000500 |
|        | C | 1.28254500  | -0.43567400 | 0.00000400  |
|        | H | 1.75515600  | -0.97580100 | 0.86896000  |
|        | H | 1.75515900  | -0.97579900 | -0.86895300 |
| TS22   | C | 0.98867700  | 0.30262000  | -0.29468500 |
|        | O | -0.94951300 | -0.96454300 | -0.28394200 |
|        | H | 0.47258600  | -0.20971200 | -1.25149800 |
|        | O | -0.08049800 | 1.06362100  | 0.09024600  |
|        | C | -1.16471400 | 0.17893600  | 0.19097300  |
|        | H | -1.51815200 | 0.15464100  | 1.26461600  |
|        | H | -2.00083900 | 0.75002700  | -0.30213300 |
|        | O | 1.32013200  | -0.66253000 | 0.40454900  |
|        | H | 1.78165500  | 0.92332300  | -0.77553400 |
| P22    | C | -1.08496400 | -0.11395400 | 0.28407900  |
|        | O | -2.16761800 | -0.23706800 | -0.13986300 |
|        | O | 1.77467600  | -0.66826400 | -0.04925300 |
|        | H | -0.73539800 | -0.50365500 | 1.27511700  |
|        | H | 1.93957100  | -0.72172300 | -0.98674600 |
|        | O | -0.13057900 | 0.53142300  | -0.36699100 |
|        | C | 1.13203400  | 0.49147400  | 0.21749200  |
|        | H | 1.64867900  | 1.38716200  | -0.16410500 |
|        | H | 1.05289700  | 0.56436700  | 1.31516000  |
| TS23   | C | -1.21988500 | 0.23617800  | -0.06612700 |
|        | O | -1.02655200 | -0.97308500 | 0.16176200  |
|        | O | 1.25198400  | -0.74794300 | -0.27304700 |
|        | H | -2.27242900 | 0.55029400  | -0.23527600 |
|        | H | 0.09499000  | -1.10552100 | 0.04176900  |
|        | O | -0.35486500 | 1.10799600  | -0.11671100 |
|        | C | 1.25756400  | 0.38737900  | 0.22389500  |
|        | H | 1.86286900  | 1.18496000  | -0.24856200 |
|        | H | 1.12395300  | 0.53317900  | 1.31942900  |
| CH3CHO | O | 1.21610700  | -0.27158800 | 0.00000100  |
|        | C | 0.23611100  | 0.38457100  | -0.00000300 |
|        | H | 0.29245900  | 1.51316100  | 0.00000200  |
|        | C | -1.14901800 | -0.14641400 | -0.00000400 |
|        | H | -1.69085600 | 0.23491300  | 0.87502800  |

|     |   |             |             |             |
|-----|---|-------------|-------------|-------------|
|     | H | -1.69096500 | 0.23511200  | -0.87487800 |
|     | H | -1.16205500 | -1.23942300 | -0.00011400 |
| C1  | C | 1.37494900  | -1.04280700 | 0.20839600  |
|     | O | 1.75971300  | -0.06338500 | -0.42992200 |
|     | O | 1.76093000  | 1.11189300  | 0.18410100  |
|     | H | 1.07953200  | -0.92678100 | 1.25516300  |
|     | H | 1.36314400  | -1.98633000 | -0.33913100 |
|     | O | -1.28670100 | -1.17373000 | 0.03106000  |
|     | C | -1.98148400 | -0.21720700 | -0.05719700 |
|     | H | -3.09215900 | -0.34469100 | -0.20675700 |
|     | C | -1.53498600 | 1.18798900  | 0.00878700  |
|     | H | -1.81908400 | 1.69432100  | -0.92371100 |
|     | H | -2.09792500 | 1.70557600  | 0.79699200  |
|     | H | -0.45592600 | 1.29183200  | 0.17561600  |
| TS1 | C | 1.66435700  | -0.83741100 | 0.40156200  |
|     | O | 1.74387500  | 0.07235800  | -0.42369400 |
|     | O | 1.33776500  | 1.27452400  | -0.06217000 |
|     | H | 1.28062500  | -0.62972500 | 1.40435000  |
|     | H | 1.98243300  | -1.81848000 | 0.04562900  |
|     | O | -0.99051500 | -1.24041100 | -0.00717900 |
|     | C | -1.79845500 | -0.41429100 | -0.26815500 |
|     | C | -1.82865700 | 0.96441800  | 0.25991300  |
|     | H | -0.98986500 | 1.16463200  | 0.93102300  |
|     | H | -2.64372200 | -0.65644600 | -0.97594500 |
|     | H | -1.79045500 | 1.67141900  | -0.57864200 |
|     | H | -2.79148800 | 1.14053400  | 0.75800400  |
| C2  | C | -1.68195000 | 0.57254700  | 0.54531400  |
|     | O | -1.63032200 | -0.32423800 | -0.29704300 |
|     | O | -0.69358100 | -1.24426200 | -0.13051600 |
|     | H | -1.02161900 | 0.54527500  | 1.41573200  |
|     | H | -2.42844300 | 1.34575200  | 0.35150200  |
|     | O | 0.60108500  | 1.29439500  | -0.23800200 |
|     | C | 1.17947900  | 0.28386300  | -0.49433300 |
|     | C | 2.03897600  | -0.46030500 | 0.45660700  |
|     | H | 1.86763700  | -1.53778400 | 0.37260100  |
|     | H | 3.09068800  | -0.28097200 | 0.19179100  |
|     | H | 1.87580700  | -0.12812500 | 1.48611400  |
|     | H | 1.17944000  | -0.12793300 | -1.53877000 |
| TS2 | C | -1.38368400 | 0.53733600  | 0.61227500  |
|     | O | -1.52412100 | -0.38581200 | -0.20567200 |
|     | O | -0.47327200 | -1.22774000 | -0.17041500 |
|     | H | -0.72360800 | 0.41191300  | 1.47208400  |
|     | H | -2.10944000 | 1.35121900  | 0.53143200  |
|     | O | 0.29394800  | 1.22573500  | -0.39155500 |
|     | C | 0.95616600  | 0.21147300  | -0.53180600 |
|     | C | 1.90427800  | -0.28938600 | 0.49302400  |
|     | H | 1.57105000  | -0.03205300 | 1.50396000  |
|     | H | 2.04723800  | -1.37108600 | 0.41669300  |
|     | H | 2.87954100  | 0.19145900  | 0.33100500  |
|     | H | 1.10221600  | -0.20545200 | -1.55500100 |
| P1  | C | -1.34731400 | 0.59240500  | 0.23684500  |
|     | O | -1.34860800 | -0.72168500 | -0.15951500 |

|         |   |             |             |             |
|---------|---|-------------|-------------|-------------|
|         | O | -0.03105500 | -1.06941400 | 0.20562200  |
|         | H | -1.48975400 | 0.69109900  | 1.33282900  |
|         | H | -2.16856100 | 1.09389800  | -0.30297500 |
|         | O | -0.11775400 | 1.08545600  | -0.12885700 |
|         | C | 0.65008800  | -0.03631300 | -0.40142000 |
|         | H | 0.67981700  | -0.19949000 | -1.50156800 |
|         | C | 2.01121700  | 0.06949100  | 0.18743200  |
|         | H | 2.59387600  | -0.83198500 | -0.02327500 |
|         | H | 2.53428100  | 0.92373100  | -0.25031000 |
|         | H | 1.94572400  | 0.21438700  | 1.27015500  |
| C2H5CHO | C | -0.98140800 | -0.22258000 | 0.00000000  |
|         | O | -0.69466500 | -1.36770700 | 0.00000000  |
|         | H | -2.06076200 | 0.11104500  | 0.00000000  |
|         | C | 0.00000000  | 0.89723800  | 0.00000000  |
|         | H | -0.24467100 | 1.53544300  | -0.86609100 |
|         | H | -0.24467100 | 1.53544300  | 0.86609100  |
|         | C | 1.42892300  | 0.45438100  | 0.00000000  |
|         | H | 1.65338100  | -0.16065000 | -0.87822600 |
|         | H | 2.11557100  | 1.30679500  | 0.00000000  |
|         | H | 1.65338100  | -0.16065000 | 0.87822600  |
| C3      | C | 2.13460200  | 0.32174600  | 0.47874500  |
|         | O | 1.57466000  | -0.74948900 | 0.24608200  |
|         | O | 1.01376800  | -0.88355300 | -0.94698700 |
|         | H | 2.20608600  | 1.08301500  | -0.30204300 |
|         | H | 2.54615900  | 0.41973700  | 1.48556500  |
|         | O | -0.14728900 | 1.38278000  | 0.36740300  |
|         | C | -0.68552600 | 0.89740500  | -0.57920100 |
|         | H | -0.44702000 | 1.23976800  | -1.62281200 |
|         | C | -1.78794500 | -0.09943700 | -0.49523300 |
|         | H | -2.70282200 | 0.44526600  | -0.79175700 |
|         | H | -1.63396400 | -0.84024400 | -1.29170100 |
|         | C | -1.93023100 | -0.72875500 | 0.85442400  |
|         | H | -2.06611400 | 0.02568100  | 1.63696600  |
|         | H | -2.78437100 | -1.41276200 | 0.89142700  |
|         | H | -1.03246100 | -1.30412800 | 1.10994900  |
| TS3     | C | -1.98093700 | 0.32827300  | -0.33878100 |
|         | O | -1.46410700 | -0.79969400 | -0.33947900 |
|         | O | -0.75172000 | -1.00484800 | 0.79332600  |
|         | H | -2.15087000 | 0.85015800  | 0.60591600  |
|         | H | -2.45490200 | 0.63027400  | -1.27724300 |
|         | O | -0.14392700 | 1.23352400  | -0.38011500 |
|         | C | 0.39875600  | 0.75681400  | 0.59967800  |
|         | H | 0.06235600  | 1.03101900  | 1.62874500  |
|         | C | 1.72844100  | 0.09242600  | 0.52244700  |
|         | H | 2.46996000  | 0.87571400  | 0.76291200  |
|         | H | 1.79991900  | -0.63322700 | 1.34331400  |
|         | C | 2.00751200  | -0.52796800 | -0.81114000 |
|         | H | 3.00151200  | -0.98646300 | -0.83705600 |
|         | H | 1.27087400  | -1.30875400 | -1.03298900 |
|         | H | 1.95654500  | 0.21214500  | -1.61668000 |
| P3      | C | 1.88658300  | -0.21047400 | -0.16847000 |
|         | O | 1.21844000  | 0.92691200  | -0.53121200 |

|         |   |             |             |             |
|---------|---|-------------|-------------|-------------|
|         | O | 0.30398500  | 0.97760900  | 0.54873100  |
|         | H | 2.57681400  | -0.01935800 | 0.67937300  |
|         | H | 2.44181600  | -0.56883700 | -1.04976500 |
|         | O | 0.90589800  | -1.10341700 | 0.18665000  |
|         | C | -0.18625300 | -0.32052600 | 0.52019200  |
|         | C | -1.30753200 | -0.51618800 | -0.45630700 |
|         | H | -0.94037900 | -0.20673500 | -1.44544800 |
|         | H | -1.50379900 | -1.59557300 | -0.52436800 |
|         | H | -0.51412100 | -0.52070000 | 1.56172800  |
|         | C | -2.53898100 | 0.24130300  | -0.06157300 |
|         | H | -2.34173700 | 1.31803100  | 0.00454800  |
|         | H | -3.35228000 | 0.10099200  | -0.78086200 |
|         | H | -2.91580200 | -0.08134600 | 0.91838600  |
| C3H7CHO | C | -1.54479400 | 0.39266800  | 0.00000000  |
|         | O | -1.98112000 | -0.70447300 | -0.00000300 |
|         | H | -2.22721000 | 1.29319000  | 0.00000200  |
|         | C | -0.09516800 | 0.72878600  | 0.00000200  |
|         | H | 0.08463300  | 1.39031900  | -0.86642700 |
|         | H | 0.08463200  | 1.39031400  | 0.86643400  |
|         | C | 0.82331000  | -0.45643800 | -0.00000100 |
|         | H | 0.59306000  | -1.08747600 | 0.87097700  |
|         | H | 0.59306100  | -1.08747200 | -0.87098200 |
|         | C | 2.27149300  | -0.06482200 | 0.00000100  |
|         | H | 2.52890200  | 0.53672300  | 0.88217400  |
|         | H | 2.93393200  | -0.93771000 | 0.00000000  |
|         | H | 2.52890400  | 0.53672700  | -0.88216800 |
| C4      | C | 2.38889500  | 0.08066600  | -0.63180800 |
|         | O | 1.80201000  | 0.82458800  | 0.15444200  |
|         | O | 1.33377300  | 0.27965600  | 1.26541000  |
|         | H | 2.55384400  | -0.96862100 | -0.37417900 |
|         | H | 2.72464000  | 0.55609900  | -1.55577000 |
|         | O | 0.14482100  | -1.11869400 | -1.01139000 |
|         | C | -0.25878900 | -1.32544700 | 0.09040600  |
|         | H | 0.26302400  | -2.04879700 | 0.77480100  |
|         | C | -1.51894800 | -0.76682000 | 0.65132600  |
|         | H | -2.15695200 | -1.64326900 | 0.86169400  |
|         | H | -1.28131100 | -0.35716400 | 1.64575700  |
|         | C | -2.22471700 | 0.23348700  | -0.22099500 |
|         | H | -2.35117900 | -0.19512300 | -1.22697400 |
|         | H | -3.24220500 | 0.38303900  | 0.16951500  |
|         | C | -1.51618100 | 1.55515800  | -0.31372200 |
|         | H | -0.54438900 | 1.45855100  | -0.80975300 |
|         | H | -2.10175800 | 2.28572600  | -0.88411200 |
|         | H | -1.33011200 | 1.98289500  | 0.68008700  |
| TS4     | C | -2.43214200 | -0.08663000 | -0.51302900 |
|         | O | -1.72582700 | -1.05633700 | -0.19637100 |
|         | O | -1.12321300 | -0.84511700 | 0.99771100  |
|         | H | -2.80057400 | 0.59493400  | 0.25740900  |
|         | H | -2.84173500 | -0.11288100 | -1.52699100 |
|         | O | -0.79587300 | 1.13514200  | -0.65773800 |
|         | C | -0.29450200 | 1.02285500  | 0.44594000  |
|         | H | -0.79697300 | 1.45069700  | 1.34688400  |

|         |   |             |             |             |
|---------|---|-------------|-------------|-------------|
|         | C | 1.13237100  | 0.64805500  | 0.63176700  |
|         | H | 1.69037300  | 1.59864600  | 0.72762000  |
|         | H | 1.24001700  | 0.15422400  | 1.60824500  |
|         | C | 1.69631500  | -0.18796100 | -0.47968700 |
|         | H | 1.08502700  | -1.09814100 | -0.57361500 |
|         | H | 1.57785800  | 0.34730900  | -1.43265800 |
|         | C | 3.13562100  | -0.54412100 | -0.25125800 |
|         | H | 3.76833800  | 0.35082500  | -0.17539900 |
|         | H | 3.26927700  | -1.10992200 | 0.68043400  |
|         | H | 3.54172400  | -1.15838700 | -1.06313900 |
| P4      | C | -2.33757200 | 0.20148600  | -0.36576300 |
|         | O | -1.62320800 | -0.93987600 | -0.60814800 |
|         | O | -0.87433200 | -0.96895400 | 0.59317300  |
|         | H | -3.14315500 | 0.02249300  | 0.37642200  |
|         | H | -2.75974000 | 0.54273600  | -1.32431200 |
|         | O | -1.41938300 | 1.10363000  | 0.11159300  |
|         | C | -0.38568800 | 0.33006200  | 0.61314200  |
|         | C | 0.86420900  | 0.51266600  | -0.19330000 |
|         | H | 0.65220200  | 0.17520400  | -1.21958300 |
|         | H | 1.06676400  | 1.59244100  | -0.26147300 |
|         | H | -0.21372400 | 0.54970600  | 1.68748000  |
|         | C | 2.04281200  | -0.21728200 | 0.38445400  |
|         | H | 1.79649000  | -1.28661400 | 0.47623300  |
|         | H | 2.21877700  | 0.13164500  | 1.41604700  |
|         | C | 3.29019400  | -0.04403600 | -0.43118000 |
|         | H | 3.57457000  | 1.01349100  | -0.51331200 |
|         | H | 4.14465300  | -0.57809700 | -0.00031700 |
|         | H | 3.15481400  | -0.41878400 | -1.45424300 |
| C4H9CHO | C | 2.17944900  | 0.20894000  | -0.00001600 |
|         | O | 2.39295400  | -0.95227700 | -0.00005000 |
|         | H | 3.02474700  | 0.95869000  | -0.00000400 |
|         | C | 0.82385400  | 0.82266800  | 0.00001400  |
|         | H | 0.77836900  | 1.50642600  | 0.86657900  |
|         | H | 0.77835200  | 1.50647300  | -0.86651400 |
|         | C | -0.30850800 | -0.15838300 | -0.00000100 |
|         | H | -0.21142700 | -0.82486800 | -0.87166300 |
|         | H | -0.21141000 | -0.82491500 | 0.87162200  |
|         | C | -1.66153300 | 0.49689200  | 0.00003000  |
|         | H | -1.74613100 | 1.16241700  | -0.87560000 |
|         | H | -1.74611400 | 1.16237100  | 0.87569500  |
|         | C | -2.78969100 | -0.49232300 | 0.00001500  |
|         | H | -3.77116200 | -0.00471800 | 0.00003600  |
|         | H | -2.75014800 | -1.14518600 | -0.88192000 |
|         | H | -2.75013200 | -1.14523100 | 0.88191700  |
| C5      | C | 2.47014400  | -0.95196100 | 0.65114800  |
|         | O | 1.76120700  | -1.22346600 | -0.31821500 |
|         | O | 1.67376900  | -0.31357700 | -1.27518600 |
|         | H | 3.03916300  | -0.01897600 | 0.66984200  |
|         | H | 2.48516900  | -1.70703000 | 1.43989700  |
|         | O | 0.78682800  | 0.89958600  | 1.23198800  |
|         | C | 0.64758600  | 1.48859600  | 0.20575500  |
|         | H | 1.49127900  | 2.07926100  | -0.24501200 |

|     |   |             |             |             |
|-----|---|-------------|-------------|-------------|
|     | C | -0.63793800 | 1.61534600  | -0.53348100 |
|     | H | -0.86418100 | 2.69605100  | -0.53742600 |
|     | H | -0.43347100 | 1.37663200  | -1.58906000 |
|     | C | -1.78053000 | 0.81279600  | 0.01964700  |
|     | H | -1.86643000 | 1.00219600  | 1.10209600  |
|     | H | -2.72168000 | 1.17897900  | -0.42124500 |
|     | C | -1.66681900 | -0.66861600 | -0.22221400 |
|     | H | -0.76186000 | -1.05188200 | 0.27067200  |
|     | H | -1.51126600 | -0.85083300 | -1.29809900 |
|     | C | -2.87085800 | -1.42049400 | 0.26356800  |
|     | H | -3.78839400 | -1.07970600 | -0.23561900 |
|     | H | -2.78786600 | -2.49915100 | 0.08652600  |
|     | H | -3.02440000 | -1.27988100 | 1.34219900  |
| TS5 | C | -2.74685300 | -0.65155400 | -0.52178200 |
|     | O | -1.95324100 | -1.22586600 | 0.23969600  |
|     | O | -1.57195400 | -0.40534600 | 1.24721100  |
|     | H | -3.32499400 | 0.20352100  | -0.16340000 |
|     | H | -2.99459700 | -1.19237200 | -1.43979800 |
|     | O | -1.31573600 | 0.69461300  | -1.09620300 |
|     | C | -0.96901800 | 1.17008100  | -0.03047000 |
|     | H | -1.65664100 | 1.83196900  | 0.54944300  |
|     | C | 0.45589800  | 1.20792600  | 0.39281600  |
|     | H | 0.84085700  | 2.19899800  | 0.08697700  |
|     | H | 0.49322300  | 1.21322300  | 1.49159300  |
|     | C | 1.29579400  | 0.10960200  | -0.18751500 |
|     | H | 0.85108700  | -0.85897000 | 0.09252100  |
|     | H | 1.24576200  | 0.14910500  | -1.28671600 |
|     | C | 2.72851200  | 0.16540100  | 0.26390300  |
|     | H | 3.16034800  | 1.14467300  | -0.00408100 |
|     | H | 2.76669800  | 0.12520300  | 1.36526900  |
|     | C | 3.56621000  | -0.93651000 | -0.31545100 |
|     | H | 3.57664100  | -0.89798800 | -1.41298400 |
|     | H | 4.60837300  | -0.88986500 | 0.02121000  |
|     | H | 3.17742700  | -1.92438200 | -0.03467600 |
| P5  | C | 2.87471800  | -0.08357100 | -0.32896600 |
|     | O | 2.07619000  | 0.98425600  | -0.63532400 |
|     | O | 1.30164400  | 1.00434500  | 0.54979000  |
|     | H | 3.64689900  | 0.19232600  | 0.41901600  |
|     | H | 3.34387100  | -0.43052400 | -1.26332300 |
|     | O | 2.02194600  | -1.03593900 | 0.17159200  |
|     | C | 0.91886200  | -0.32804000 | 0.61957500  |
|     | C | -0.29466700 | -0.64695200 | -0.19987600 |
|     | H | -0.08735400 | -0.33945500 | -1.23636100 |
|     | H | -0.40769900 | -1.74155000 | -0.22139100 |
|     | H | 0.74243300  | -0.51410300 | 1.69947400  |
|     | C | -1.53902800 | 0.00952000  | 0.32252600  |
|     | H | -1.38605400 | 1.10054700  | 0.37035600  |
|     | H | -1.71329700 | -0.30538400 | 1.36703100  |
|     | C | -2.76297900 | -0.29142900 | -0.49715000 |
|     | H | -2.58752800 | 0.02551300  | -1.53845400 |
|     | H | -2.90705000 | -1.38358400 | -0.54886300 |
|     | C | -4.00288200 | 0.36414400  | 0.03557100  |

|                                    |             |             |             |             |
|------------------------------------|-------------|-------------|-------------|-------------|
|                                    | H           | -4.88700800 | 0.13898300  | -0.57172900 |
|                                    | H           | -4.22144200 | 0.03703300  | 1.06096100  |
|                                    | H           | -3.89816000 | 1.45686500  | 0.06472600  |
| C <sub>5</sub> H <sub>11</sub> CHO | C           | 2.79255500  | 0.24359400  | -0.00000200 |
|                                    | O           | 3.03703800  | -0.91153700 | -0.00001600 |
|                                    | H           | 3.61748900  | 1.01574600  | 0.00000600  |
|                                    | C           | 1.42098800  | 0.82066100  | 0.00000700  |
|                                    | H           | 1.35711700  | 1.50296800  | 0.86654000  |
|                                    | H           | 1.35711500  | 1.50298900  | -0.86651000 |
|                                    | C           | 0.31554900  | -0.19081800 | -0.00000400 |
|                                    | H           | 0.43170700  | -0.85398400 | -0.87169200 |
|                                    | H           | 0.43171100  | -0.85400500 | 0.87166800  |
|                                    | C           | -1.05361200 | 0.42749700  | 0.00000700  |
|                                    | H           | -1.16113700 | 1.09175300  | -0.87613100 |
|                                    | H           | -1.16113300 | 1.09173200  | 0.87616100  |
|                                    | C           | -2.16918900 | -0.58037200 | -0.00000300 |
|                                    | H           | -2.05935600 | -1.24167900 | 0.87535200  |
|                                    | H           | -2.05936000 | -1.24165800 | -0.87537500 |
|                                    | C           | -3.53186900 | 0.04744200  | 0.00000700  |
|                                    | H           | -4.33481800 | -0.69854100 | 0.00000000  |
|                                    | H           | -3.68108100 | 0.68446700  | 0.88217900  |
| H                                  | -3.68108500 | 0.68448800  | -0.88214800 |             |
| C6                                 | C           | -3.19606200 | -1.08114800 | -0.60727700 |
|                                    | O           | -2.31289000 | -1.39392500 | 0.19110900  |
|                                    | O           | -2.18620400 | -0.63445000 | 1.26962100  |
|                                    | H           | -3.87016400 | -0.25133800 | -0.38067500 |
|                                    | H           | -3.24527600 | -1.69706300 | -1.50778200 |
|                                    | O           | -1.86042800 | 1.00776800  | -1.05924400 |
|                                    | C           | -1.51335700 | 1.40631700  | 0.00961600  |
|                                    | H           | -2.22334200 | 1.96200400  | 0.68085100  |
|                                    | C           | -0.11876900 | 1.32579800  | 0.52067700  |
|                                    | H           | 0.27527000  | 2.35932000  | 0.48972200  |
|                                    | H           | -0.16261000 | 1.07765900  | 1.59142100  |
|                                    | C           | 0.76561900  | 0.38469200  | -0.23895000 |
|                                    | H           | 0.32929400  | -0.62653500 | -0.19116300 |
|                                    | H           | 0.75720600  | 0.65316000  | -1.30697400 |
|                                    | C           | 2.17672900  | 0.35437700  | 0.27511100  |
|                                    | H           | 2.17508200  | 0.08996200  | 1.34726800  |
|                                    | H           | 2.60960300  | 1.36997300  | 0.23116900  |
|                                    | C           | 3.06891100  | -0.59836200 | -0.47090300 |
|                                    | H           | 3.06670400  | -0.33408800 | -1.54157600 |
|                                    | H           | 2.63563000  | -1.61124100 | -0.42337000 |
|                                    | C           | 4.47659900  | -0.61929700 | 0.04813500  |
| H                                  | 5.11555400  | -1.31813800 | -0.50415100 |             |
| H                                  | 4.94489900  | 0.37189100  | -0.02045200 |             |
| H                                  | 4.51031600  | -0.91497300 | 1.10537000  |             |
| TS6                                | C           | -3.22949000 | -0.77222300 | -0.51752200 |
|                                    | O           | -2.38602600 | -1.31653500 | 0.21171300  |
|                                    | O           | -2.04407500 | -0.50665400 | 1.24174000  |
|                                    | H           | -3.85814400 | 0.02864600  | -0.12092500 |
|                                    | H           | -3.45576300 | -1.29738300 | -1.45004800 |
|                                    | O           | -1.90314100 | 0.68696700  | -1.06574800 |

|                      |   |             |             |             |
|----------------------|---|-------------|-------------|-------------|
|                      | C | -1.57304300 | 1.14994900  | 0.01069100  |
|                      | H | -2.29579800 | 1.74184200  | 0.62267200  |
|                      | C | -0.14757400 | 1.27346600  | 0.41514000  |
|                      | H | 0.16241600  | 2.29895900  | 0.13923600  |
|                      | H | -0.09290200 | 1.24381000  | 1.51278500  |
|                      | C | 0.75684700  | 0.25674800  | -0.21508500 |
|                      | H | 0.38280200  | -0.74883800 | 0.03589700  |
|                      | H | 0.68676300  | 0.33168800  | -1.31120400 |
|                      | C | 2.18791600  | 0.39535100  | 0.21991600  |
|                      | H | 2.55336400  | 1.41041900  | -0.01888800 |
|                      | H | 2.24985700  | 0.32025100  | 1.32001600  |
|                      | C | 3.10583600  | -0.62133000 | -0.39980800 |
|                      | H | 3.04250600  | -0.54502500 | -1.49812600 |
|                      | H | 2.73882300  | -1.63302500 | -0.15997200 |
|                      | C | 4.53252400  | -0.47629200 | 0.04174900  |
|                      | H | 5.19003700  | -1.22413800 | -0.41660000 |
|                      | H | 4.93519100  | 0.51221100  | -0.21756400 |
|                      | H | 4.62868000  | -0.58365800 | 1.13059500  |
| P6                   | C | 3.39235700  | -0.07220400 | -0.44693600 |
|                      | O | 2.57543300  | 0.99988700  | -0.68150700 |
|                      | O | 1.87565400  | 0.99437100  | 0.54937200  |
|                      | H | 4.20934800  | 0.19026300  | 0.25697800  |
|                      | H | 3.80277000  | -0.39925700 | -1.41551200 |
|                      | O | 2.57324900  | -1.03627200 | 0.08635100  |
|                      | C | 1.49900100  | -0.33994200 | 0.61534000  |
|                      | C | 0.23783700  | -0.64475000 | -0.13462400 |
|                      | H | 0.38144000  | -0.31697500 | -1.17564000 |
|                      | H | 0.12412400  | -1.73886800 | -0.17057800 |
|                      | H | 1.38927500  | -0.54827200 | 1.69999300  |
|                      | C | -0.97254300 | -0.00028500 | 0.47553400  |
|                      | H | -0.81638400 | 1.08961900  | 0.53428000  |
|                      | H | -1.08120500 | -0.33543100 | 1.52250100  |
|                      | C | -2.24327300 | -0.28782200 | -0.27271600 |
|                      | H | -2.13700800 | 0.04944500  | -1.31869900 |
|                      | H | -2.39406800 | -1.37997900 | -0.33824200 |
|                      | C | -3.46156600 | 0.34871800  | 0.33590700  |
|                      | H | -3.56496700 | 0.00931900  | 1.38013000  |
|                      | H | -3.30651500 | 1.43845100  | 0.40154800  |
|                      | C | -4.72190200 | 0.05602000  | -0.42381900 |
|                      | H | -4.91847400 | -1.02333700 | -0.47542600 |
|                      | H | -5.60219400 | 0.52414700  | 0.03148900  |
|                      | H | -4.66029300 | 0.41857300  | -1.45866600 |
| CH <sub>2</sub> FCHO | O | -1.79026700 | 0.08030800  | -0.00000100 |
|                      | C | -0.69671800 | -0.35478400 | 0.00000100  |
|                      | C | 0.53640700  | 0.49759900  | 0.00000100  |
|                      | H | 0.52349400  | 1.15171400  | -0.88819800 |
|                      | H | 0.52349300  | 1.15171400  | 0.88819800  |
|                      | H | -0.47028200 | -1.46075600 | 0.00000100  |
|                      | F | 1.63414400  | -0.26022500 | -0.00000100 |
| C7                   | C | -2.19395700 | 0.22367300  | 0.49570600  |
|                      | O | -1.84597000 | -0.64783900 | -0.30168800 |
|                      | O | -0.68490100 | -1.24099500 | -0.06563900 |

|                      |   |             |             |             |
|----------------------|---|-------------|-------------|-------------|
|                      | H | -3.12642500 | 0.73409100  | 0.24450000  |
|                      | O | -0.18538500 | 1.53434300  | -0.22867400 |
|                      | C | 0.62300000  | 0.70055000  | -0.49388400 |
|                      | C | 1.67283200  | 0.25185400  | 0.47346800  |
|                      | H | 2.32736700  | 1.11487100  | 0.69522100  |
|                      | H | 1.19459000  | -0.06101100 | 1.41497100  |
|                      | H | 0.73530600  | 0.25991800  | -1.51910900 |
|                      | F | 2.39832700  | -0.74314300 | -0.03437000 |
|                      | H | -1.59697700 | 0.41988500  | 1.39000200  |
| TS7                  | C | 1.44439000  | 0.93619100  | -0.20332800 |
|                      | O | 1.79551500  | -0.25151100 | -0.27403300 |
|                      | O | 0.77712000  | -1.04482400 | -0.65638400 |
|                      | H | 2.17963600  | 1.60626400  | 0.25204400  |
|                      | O | 0.06086400  | 0.42164200  | 1.31808600  |
|                      | C | -0.50512100 | -0.52986800 | 0.82064600  |
|                      | C | -1.66977300 | -0.38313800 | -0.10614900 |
|                      | H | -1.68360900 | -1.20375000 | -0.83939500 |
|                      | H | -2.59803100 | -0.44489600 | 0.49280500  |
|                      | H | -0.42913900 | -1.54697700 | 1.27413100  |
|                      | F | -1.63367800 | 0.79618400  | -0.73608400 |
|                      | H | 0.54927100  | 1.28213800  | -0.72320300 |
| P7                   | C | -1.84706300 | 0.43093900  | 0.18906000  |
|                      | O | -1.63348300 | -0.87738800 | -0.15740000 |
|                      | O | -0.29150100 | -1.00295600 | 0.26429900  |
|                      | H | -2.71695200 | 0.78457000  | -0.38859600 |
|                      | O | -0.69482000 | 1.09615700  | -0.17431100 |
|                      | C | 0.23869500  | 0.09911600  | -0.36734400 |
|                      | C | 1.53237000  | 0.48735100  | 0.28308300  |
|                      | H | 1.77146500  | 1.51899600  | -0.01816000 |
|                      | H | 1.41702500  | 0.45824400  | 1.37857400  |
|                      | H | 0.38152100  | -0.10336300 | -1.45129400 |
|                      | F | 2.50983200  | -0.33732300 | -0.09854100 |
|                      | H | -2.02712400 | 0.54652700  | 1.27686000  |
| CHF <sub>2</sub> CHO | O | -1.96861300 | -0.00000400 | -0.20462000 |
|                      | C | -0.94530900 | -0.00000900 | 0.36994900  |
|                      | C | 0.41435800  | -0.00000100 | -0.32568900 |
|                      | H | 0.31325300  | -0.00000100 | -1.42741900 |
|                      | H | -0.85708400 | -0.00002000 | 1.49342600  |
|                      | F | 1.08212300  | 1.06248200  | 0.07252300  |
|                      | F | 1.08214800  | -1.06247000 | 0.07252000  |
| C8                   | C | -2.05220300 | 0.25125100  | 0.80215400  |
|                      | O | -2.18255500 | -0.28815000 | -0.29839800 |
|                      | O | -1.16986500 | -1.06552000 | -0.67752800 |
|                      | H | -2.85446200 | 0.94359200  | 1.07049500  |
|                      | O | -0.20307100 | 1.43685100  | -0.15057700 |
|                      | C | 0.36846600  | 0.57449800  | -0.73932000 |
|                      | C | 1.31770200  | -0.40001500 | -0.05089400 |
|                      | H | 1.20088800  | -1.43276700 | -0.42655700 |
|                      | H | 0.38506200  | 0.50388700  | -1.85469100 |
|                      | F | 2.55539700  | 0.01175600  | -0.28168600 |
|                      | H | -1.21189100 | -0.01008200 | 1.45045400  |
|                      | F | 1.12466200  | -0.37003200 | 1.24842900  |

|                     |             |             |             |             |
|---------------------|-------------|-------------|-------------|-------------|
| TS8                 | C           | 1.92536200  | -0.81158000 | -0.24436700 |
|                     | O           | 2.13050500  | 0.28417900  | 0.29421000  |
|                     | O           | 1.08221500  | 0.70405100  | 1.02082400  |
|                     | H           | 2.69551800  | -1.12408400 | -0.95561600 |
|                     | O           | 0.30696100  | 0.10125300  | -1.37757300 |
|                     | C           | -0.26361200 | 0.72225400  | -0.51512300 |
|                     | C           | -1.30370800 | 0.07938000  | 0.39042800  |
|                     | H           | -1.27997100 | 0.49542500  | 1.41478100  |
|                     | H           | -0.30392000 | 1.83615100  | -0.51573500 |
|                     | F           | -2.49900200 | 0.28850600  | -0.13700500 |
|                     | H           | 1.10921400  | -1.45297700 | 0.09273300  |
|                     | F           | -1.11505900 | -1.22302900 | 0.43461800  |
| P8                  | C           | 1.98785000  | -0.58169700 | 0.30551100  |
|                     | O           | 2.03601000  | 0.68433200  | -0.21090200 |
|                     | O           | 0.71842300  | 1.09416000  | 0.09060600  |
|                     | H           | 2.82110600  | -1.15219000 | -0.13424500 |
|                     | O           | 0.77212800  | -1.08666000 | -0.10511600 |
|                     | C           | 0.01754500  | 0.02199500  | -0.40635400 |
|                     | C           | -1.31220400 | -0.03498600 | 0.31815500  |
|                     | H           | -1.16075200 | -0.12217300 | 1.41247400  |
|                     | H           | -0.14960500 | 0.09706300  | -1.50283600 |
|                     | F           | -2.00599700 | 1.04707400  | 0.04590400  |
|                     | H           | 2.05460500  | -0.57613500 | 1.41218300  |
|                     | F           | -1.98700200 | -1.07075000 | -0.12236500 |
| CF <sub>3</sub> CHO | O           | 2.01691100  | 0.13322100  | 0.00000000  |
|                     | C           | 1.06847400  | -0.55203800 | 0.00000000  |
|                     | C           | -0.36641700 | 0.00480600  | 0.00000000  |
|                     | H           | 1.09375200  | -1.67536500 | 0.00000000  |
|                     | F           | -0.99836400 | -0.42921200 | 1.05263200  |
|                     | F           | -0.38564500 | 1.29098400  | -0.00000300 |
| C8                  | F           | -0.99836600 | -0.42921700 | -1.05262900 |
|                     | C           | 2.24579400  | -0.39590400 | 0.69104500  |
|                     | O           | 2.26681000  | 0.46177500  | -0.19533200 |
|                     | O           | 1.13329200  | 1.15750300  | -0.32130600 |
|                     | H           | 1.42016300  | -0.43410800 | 1.40501000  |
|                     | H           | 3.13534200  | -1.03026500 | 0.73650500  |
|                     | O           | 0.56747800  | -1.42973700 | -0.54361300 |
|                     | C           | -0.09518000 | -0.48630400 | -0.85771400 |
|                     | C           | -1.19983900 | 0.04791300  | 0.05936800  |
|                     | H           | -0.15149100 | -0.08213800 | -1.89481900 |
|                     | F           | -2.28797600 | -0.64754500 | -0.14749900 |
|                     | F           | -0.88528800 | -0.08140800 | 1.31369900  |
| F                   | -1.47665900 | 1.28850300  | -0.17963200 |             |
| TS8                 | C           | 2.23280600  | -0.39850500 | 0.68885500  |
|                     | O           | 2.26023800  | 0.46705400  | -0.19037400 |
|                     | O           | 1.12166100  | 1.15699700  | -0.31649100 |
|                     | H           | 1.40874500  | -0.43560000 | 1.40439000  |
|                     | H           | 3.12043400  | -1.03582500 | 0.73289100  |
|                     | O           | 0.58218300  | -1.41809400 | -0.54766500 |
|                     | C           | -0.08289900 | -0.47228300 | -0.85666100 |
|                     | C           | -1.19642000 | 0.04528800  | 0.05837700  |
|                     | H           | -0.14505200 | -0.06954700 | -1.89371800 |

|    |   |             |             |             |
|----|---|-------------|-------------|-------------|
|    | F | -2.27809200 | -0.65698200 | -0.15778900 |
|    | F | -0.88637200 | -0.09018300 | 1.31356800  |
|    | F | -1.48194800 | 1.28564300  | -0.17253000 |
| P8 | C | 2.03049700  | -0.61590100 | 0.32861000  |
|    | O | 2.20270900  | 0.67132400  | -0.09771400 |
|    | O | 0.86624300  | 1.11117200  | 0.00626100  |
|    | H | 1.86201900  | -0.66467700 | 1.42231100  |
|    | H | 2.91908700  | -1.19327300 | 0.03338000  |
|    | O | 0.91989800  | -1.05678300 | -0.36159700 |
|    | C | 0.20160700  | 0.07956100  | -0.61771800 |
|    | C | -1.18219500 | -0.00587300 | 0.02083900  |
|    | H | 0.09107400  | 0.23062400  | -1.71215900 |
|    | F | -1.86562800 | -0.95358800 | -0.54322900 |
|    | F | -1.09489000 | -0.26029800 | 1.28763400  |
|    | F | -1.82641900 | 1.11109700  | -0.13435200 |

**Table S32.** Absolute energies in Hartrees

| Species             | Methods                     | Total energies (a.u.) |
|---------------------|-----------------------------|-----------------------|
| CH <sub>2</sub> OO  | CCSD(T)-F12a/cc-pVTZ-F12    | -189.405683           |
|                     | CCSD(T)-F12a/cc-pVDZ-F12    | -189.381569           |
|                     | DF-CCSD(T)-F12b/jun-cc-pVDZ | -189.276824           |
|                     | DF-CCSD(T)-F12b/cc-pVDZ     | -189.261787           |
|                     | DF-CCSD(T)-F12b/VDZ(NP)     | -189.159752           |
|                     | DF-CCSD(T)-F12b/VDZ(D)      | -189.251674           |
|                     | M11-L/MG3S                  | -189.582948           |
| HCHO                | CCSD(T)-F12a/cc-pVTZ-F12    | -114.387945           |
|                     | CCSD(T)-F12a/cc-pVDZ-F12    | -114.373877           |
|                     | DF-CCSD(T)-F12b/jun-cc-pVDZ | -114.313291           |
|                     | DF-CCSD(T)-F12b/cc-pVDZ     | -114.304602           |
|                     | DF-CCSD(T)-F12b/VDZ(NP)     | -114.232172           |
|                     | DF-CCSD(T)-F12b/VDZ(D)      | -114.294812           |
|                     | M11-L/MG3S                  | -114.509429           |
| C1                  | CCSD(T)-F12a/cc-pVTZ-F12    | -303.807856           |
|                     | M11-L/MG3S                  | -341.260635           |
| TS1                 | CCSD(T)-F12a/cc-pVTZ-F12    | -303.807354           |
|                     | CCSD(T)-F12a/cc-pVDZ-F12    | -303.768782           |
|                     | DF-CCSD(T)-F12b/jun-cc-pVDZ | -303.540353           |
|                     | DF-CCSD(T)-F12b/cc-pVDZ     | -303.581219           |
|                     | DF-CCSD(T)-F12b/VDZ(NP)     | -303.409076           |
|                     | DF-CCSD(T)-F12b/VDZ(D)      | -303.561584           |
|                     | M11-L/MG3S                  | -304.104857           |
| P1                  | CCSD(T)-F12a/cc-pVTZ-F12    | -303.885292           |
|                     | M11-L/MG3S                  | -304.181539           |
| CH <sub>3</sub> CHO | CCSD(T)-F12a/cc-pVDZ-F12    | -153.640268           |
|                     | DF-CCSD(T)-F12b/jun-cc-pVDZ | -153.557475           |
|                     | DF-CCSD(T)-F12b/cc-pVDZ     | -153.548482           |
|                     | DF-CCSD(T)-F12b/VDZ(NP)     | -153.446309           |
|                     | DF-CCSD(T)-F12b/VDZ(D)      | -153.529317           |
|                     | M11-L/MG3S                  | -153.844297           |
| C2                  | DF-CCSD(T)-F12b/jun-cc-pVDZ | -342.845685           |
|                     | M11-L/MG3S                  | -343.43688            |
| TS2a                | CCSD(T)-F12a/cc-pVDZ-F12    | -343.031482           |
|                     | DF-CCSD(T)-F12b/jun-cc-pVDZ | -342.844805           |
|                     | DF-CCSD(T)-F12b/cc-pVDZ     | -342.821732           |
|                     | DF-CCSD(T)-F12b/VDZ(NP)     | -342.619902           |
|                     | DF-CCSD(T)-F12b/VDZ(D)      | -342.792314           |
|                     | M11-L/MG3S                  | -343.435864           |
| C2a                 | DF-CCSD(T)-F12b/jun-cc-pVDZ | -342.848809           |
|                     | M11-L/MG3S                  | -343.440041           |
| TS2c                | CCSD(T)-F12a/cc-pVDZ-F12    | -343.033960           |
|                     | DF-CCSD(T)-F12b/jun-cc-pVDZ | -342.846147           |
|                     | DF-CCSD(T)-F12b/cc-pVDZ     | -342.824491           |
|                     | DF-CCSD(T)-F12b/VDZ(NP)     | -342.623317           |
|                     | DF-CCSD(T)-F12b/VDZ(D)      | -342.705493           |
|                     | M11-L/MG3S                  | -343.437212           |
| P2c                 | DF-CCSD(T)-F12b/jun-cc-pVDZ | -342.921406           |

|                                    |                             |             |
|------------------------------------|-----------------------------|-------------|
|                                    | M11-L/MG3S                  | -343.512027 |
| C <sub>2</sub> H <sub>5</sub> CHO  | DF-CCSD(T)-F12b/jun-cc-pVDZ | -192.789725 |
|                                    | DF-CCSD(T)-F12b/cc-pVDZ     | -192.781196 |
|                                    | DF-CCSD(T)-F12b/VDZ(D)      | -192.753125 |
|                                    | M11-L/MG3S                  | -193.163907 |
| C3                                 | M11-L/MG3S                  | -382.759889 |
| TS3                                | DF-CCSD(T)-F12b/jun-cc-pVDZ | -382.078713 |
|                                    | DF-CCSD(T)-F12b/cc-pVDZ     | -382.057983 |
|                                    | DF-CCSD(T)-F12b/VDZ(D)      | -382.020079 |
|                                    | M11-L/MG3S                  | -382.757103 |
| P3                                 | M11-L/MG3S                  | -382.829934 |
| C <sub>3</sub> H <sub>7</sub> CHO  | DF-CCSD(T)-F12b/jun-cc-pVDZ | -232.021020 |
|                                    | DF-CCSD(T)-F12b/cc-pVDZ     | -232.012036 |
|                                    | DF-CCSD(T)-F12b/VDZ(D)      | -231.975024 |
|                                    | M11-L/MG3S                  | -232.482428 |
| C4                                 | M11-L/MG3S                  | -422.077763 |
| TS4                                | DF-CCSD(T)-F12b/jun-cc-pVDZ | -421.310265 |
|                                    | DF-CCSD(T)-F12b/cc-pVDZ     | -421.288959 |
|                                    | DF-CCSD(T)-F12b/VDZ(D)      | -421.242111 |
|                                    | M11-L/MG3S                  | -422.075669 |
| P4                                 | M11-L/MG3S                  | -422.148588 |
| C <sub>4</sub> H <sub>9</sub> CHO  | DF-CCSD(T)-F12b/jun-cc-pVDZ | -271.252756 |
|                                    | DF-CCSD(T)-F12b/cc-pVDZ     | -271.243162 |
|                                    | DF-CCSD(T)-F12b/VDZ(D)      | -271.197232 |
|                                    | M11-L/MG3S                  | -271.801365 |
| C5                                 | M11-L/MG3S                  | -461.396844 |
| TS5                                | DF-CCSD(T)-F12b/jun-cc-pVDZ | -460.542095 |
|                                    | DF-CCSD(T)-F12b/cc-pVDZ     | -460.520167 |
|                                    | DF-CCSD(T)-F12b/VDZ(D)      | -460.464410 |
|                                    | M11-L/MG3S                  | -461.39462  |
| P5                                 | M11-L/MG3S                  | -461.467575 |
| C <sub>5</sub> H <sub>11</sub> CHO | DF-CCSD(T)-F12b/VDZ(D)      | -310.419413 |
|                                    | M11-L/MG3S                  | -311.120255 |
| C6                                 | M11-L/MG3S                  | -500.716305 |
| TS6                                | DF-CCSD(T)-F12b/VDZ(D)      | -499.686473 |
|                                    | M11-L/MG3S                  | -500.786442 |
| P6                                 | M11-L/MG3S                  | -500.713502 |
| CH <sub>2</sub> FCHO               | DF-CCSD(T)-F12b/jun-cc-pVDZ | -252.662927 |
|                                    | M11-L/MG3S                  | -253.067811 |
| C7                                 | M11-L/MG3S                  | -442.664006 |
| TS7                                | DF-CCSD(T)-F12b/jun-cc-pVDZ | -441.955104 |
|                                    | M11-L/MG3S                  | -442.664155 |
| P7                                 | M11-L/MG3S                  | -442.735262 |
| CHF <sub>2</sub> CHO               | DF-CCSD(T)-F12b/jun-cc-pVDZ | -351.781899 |
|                                    | M11-L/MG3S                  | -352.309047 |
| C8                                 | M11-L/MG3S                  | -541.909455 |
| TS8                                | DF-CCSD(T)-F12b/jun-cc-pVDZ | -541.076681 |
|                                    | M11-L/MG3S                  | -541.908896 |
| P8                                 | M11-L/MG3S                  | -541.981018 |
| CF <sub>3</sub> CHO                | M11-L/MG3S                  | -451.567135 |

|     |            |             |
|-----|------------|-------------|
| C9  | M11-L/MG3S | -641.168621 |
| TS9 | M11-L/MG3S | -641.168619 |
| P9  | M11-L/MG3S | -641.239908 |

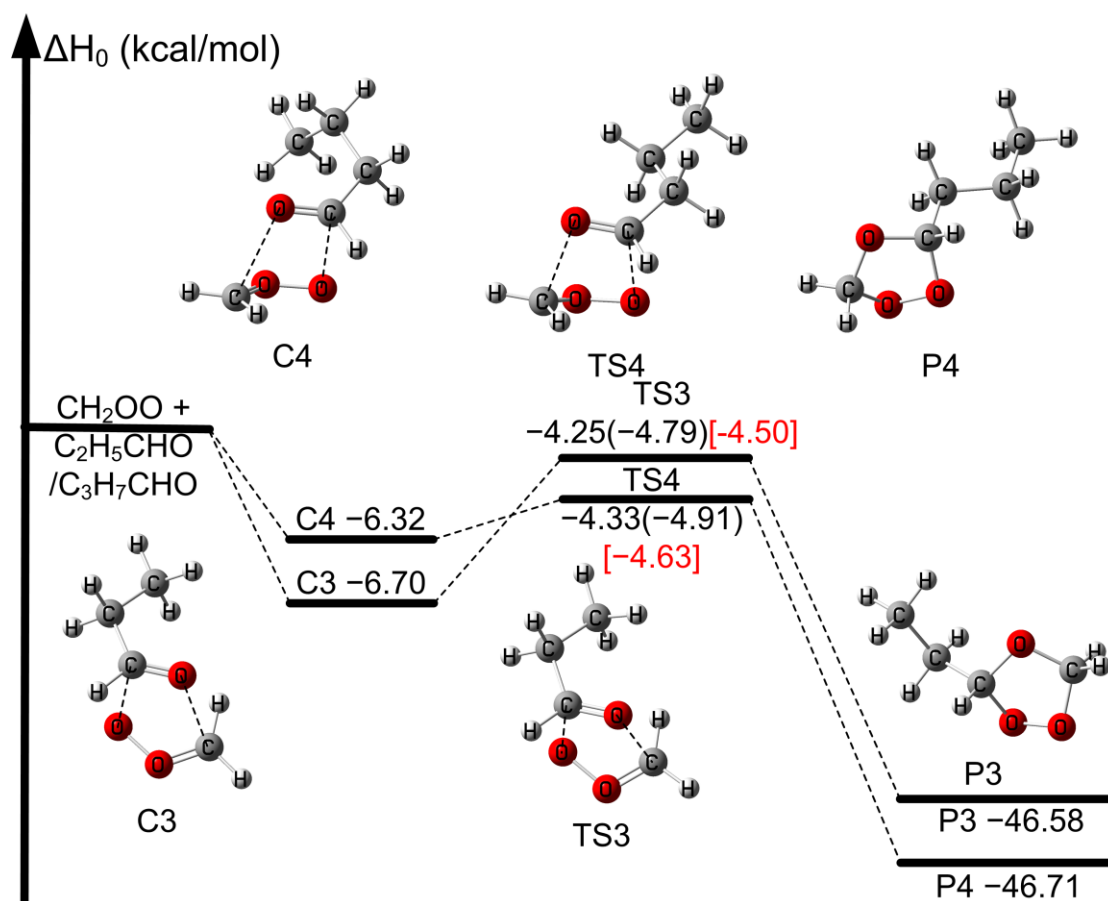

**Figure S1.** The relative enthalpies at 0 K for the reaction of  $\text{CH}_2\text{OO} + \text{RCHO}$  (R =  $\text{C}_2\text{H}_5/\text{C}_3\text{H}_7$ ). Values are given for all species as calculated by M11-L/MG3S, and in parentheses and bracket, values are given for the transition state TS path as calculated by W3X-L and BE1.

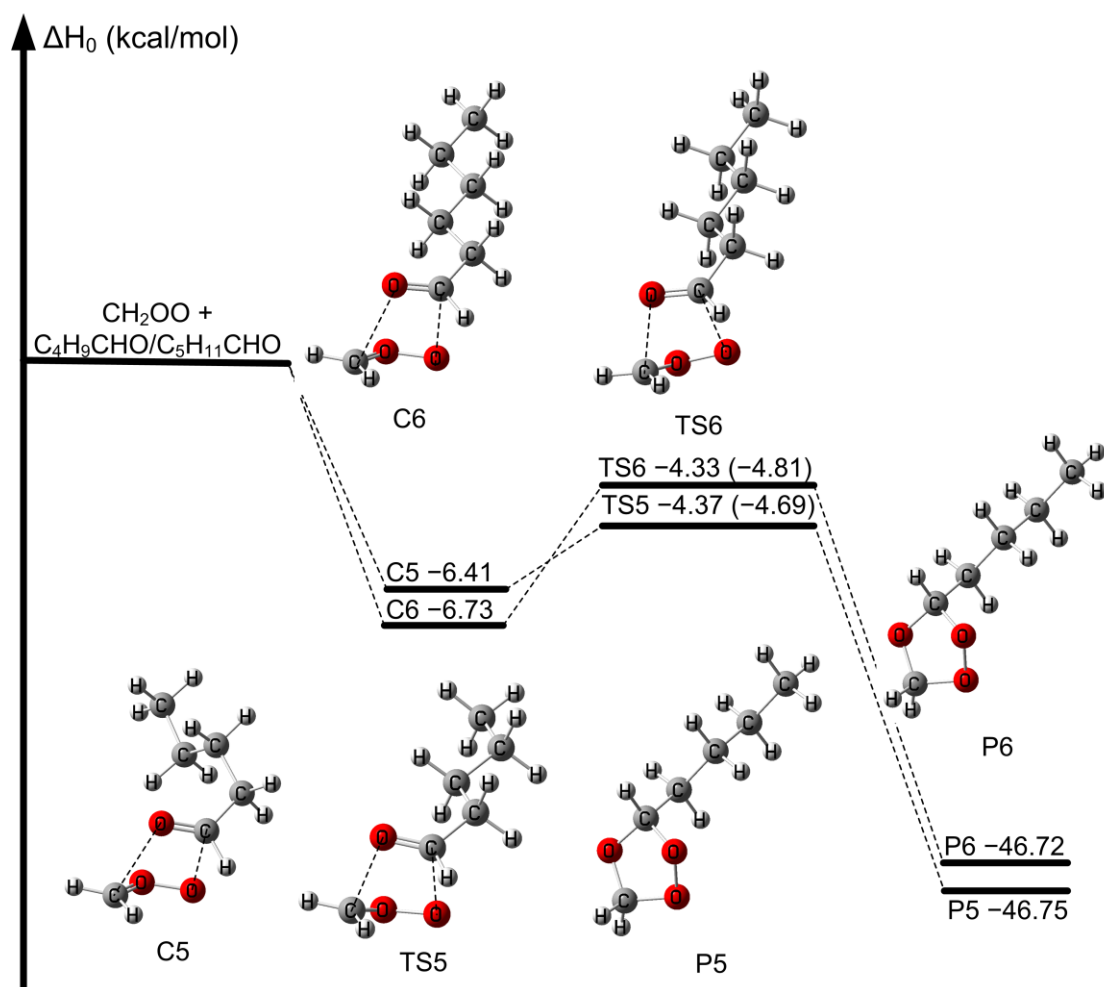

**Figure S2.** The relative enthalpies at 0 K for the reaction of  $\text{CH}_2\text{OO} + \text{RCHO}$  ( $\text{R} = \text{C}_4\text{H}_9/\text{C}_5\text{H}_{11}$ ). Values are given for all species as calculated by M11-L/MG3S, and in parentheses, values are given for the transition state TS path as calculated by BE1.

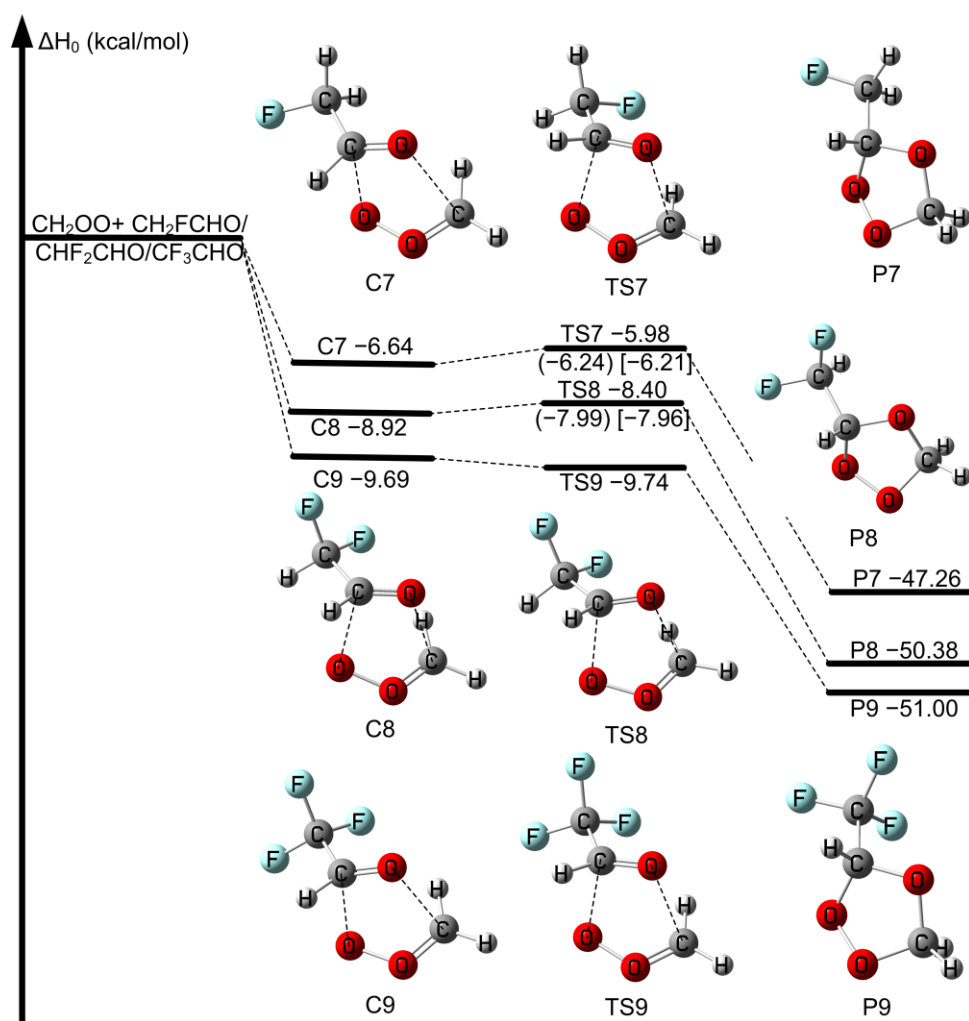

**Figure S3.** The relative enthalpies at 0 K for the reaction of  $\text{CH}_2\text{OO} + \text{CH}_2\text{FCHO}/\text{CHF}_2\text{CHO}/\text{CF}_3\text{CHO}$ . in parentheses and bracket, values are given for the transition states as calculated by BE1//DF-CCSD(T)-F12b/jun-cc-pVDZ and BE2//DF-CCSD(T)-F12b/jun-cc-pVDZ.

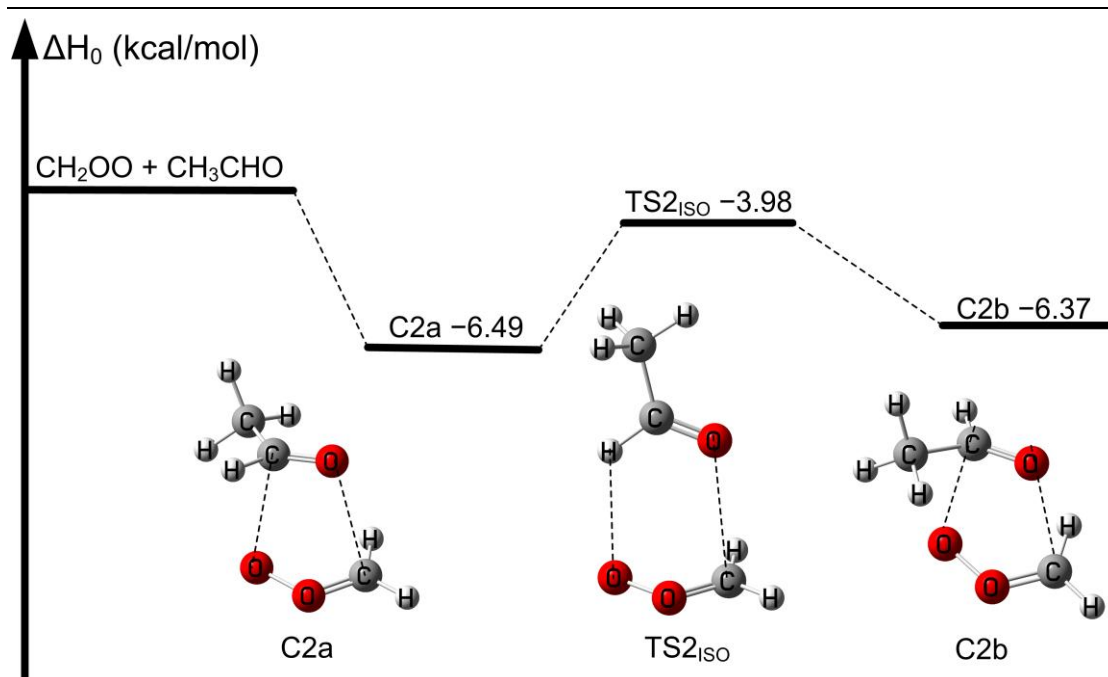

**Figure S4.** Enthalpy profile at 0 K for the conversion of C2b to C2d as calculated by M11-L/MG3S.

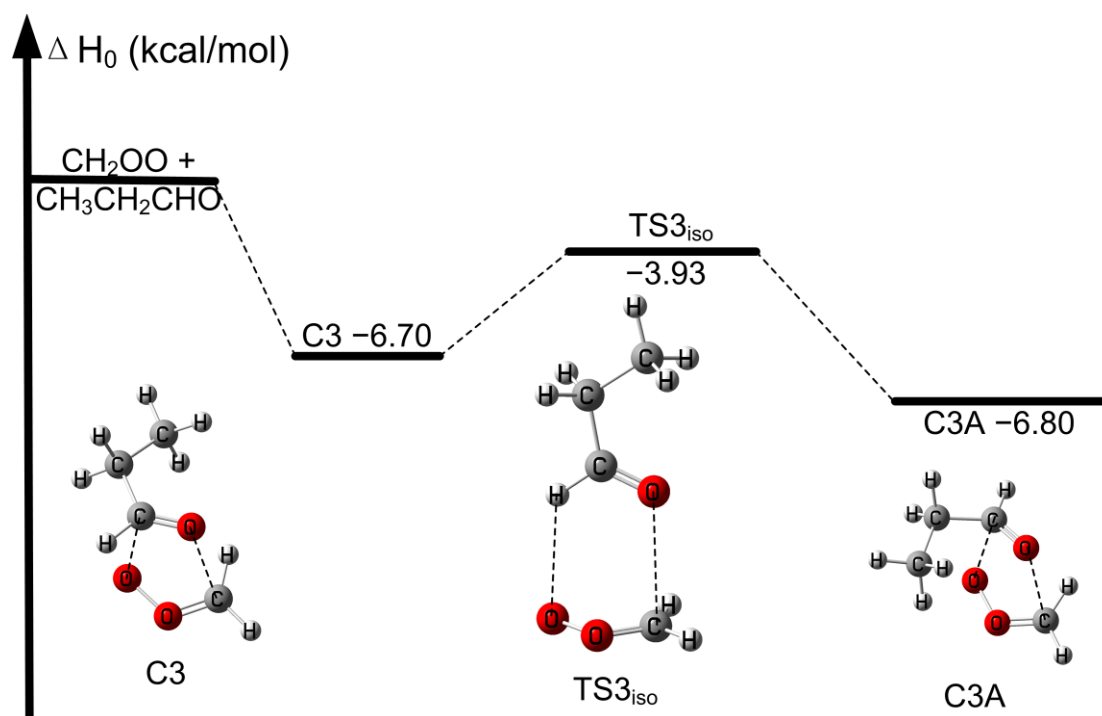

**Figure S5.** Enthalpy profile at 0 K for the conversion of C3 to C3A as calculated by M11-L/MG3S.

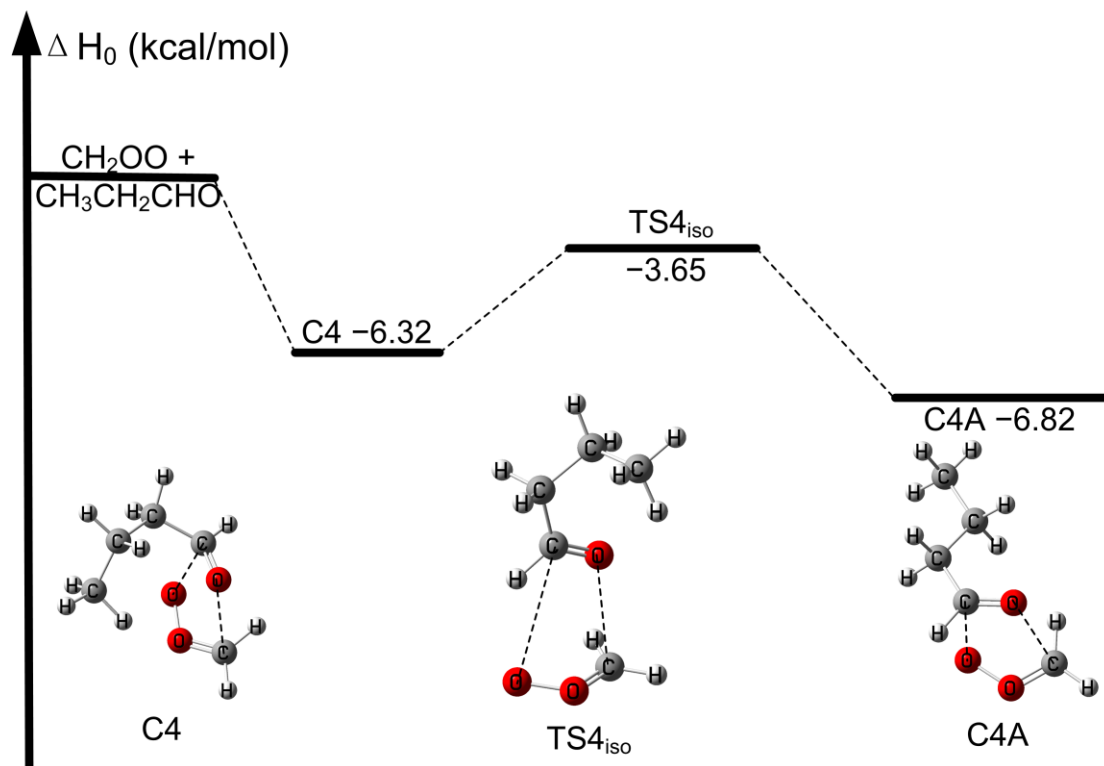

**Figure S6.** Enthalpy profile at 0 K for the conversion of C4 to C4A as calculated by M11-L/MG3S.

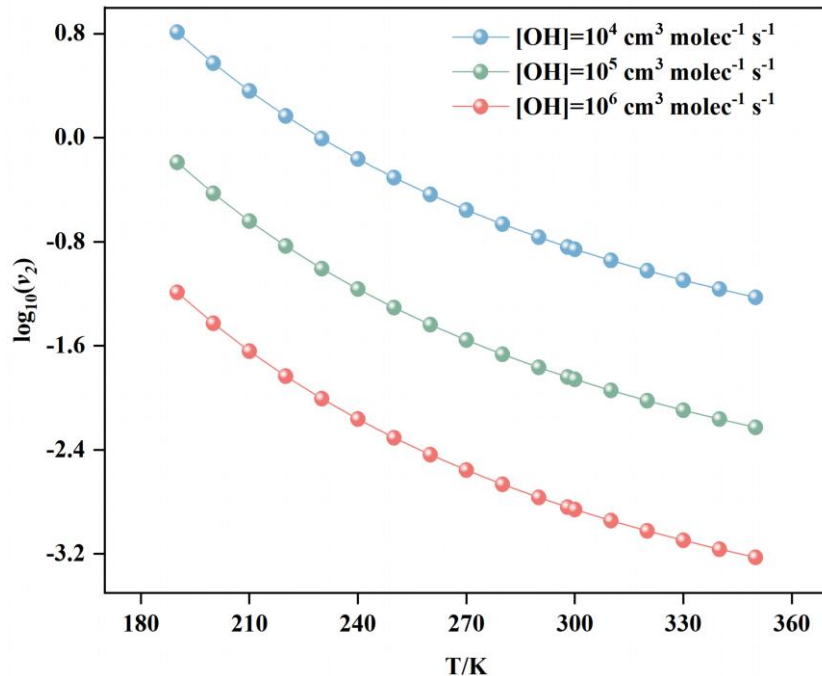

**Figure S7.** The rate ratio  $v_2$  between the reaction of  $\text{CH}_2\text{OO} + \text{CH}_3\text{CHO}$  and  $\text{OH} + \text{CH}_3\text{CHO}$  at  $[\text{CH}_2\text{OO}] = 10^4$  molecules  $\text{cm}^{-3}$  with different concentrations of OH in the temperature range of 190–350 K.

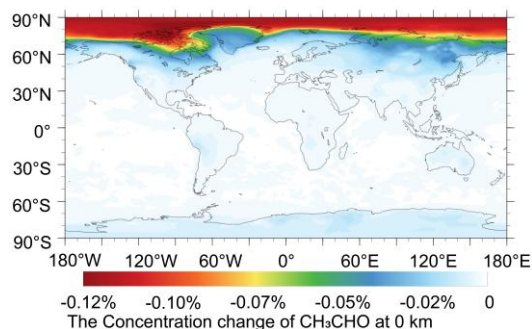

**Figure S8.** Changes in global CH<sub>3</sub>CHO concentrations due to reaction R2.

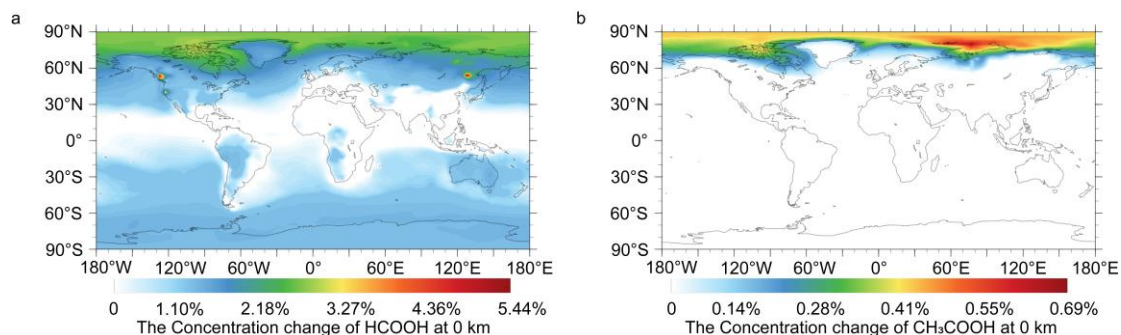

**Figure S9.** Changes in global HCOOH and CH<sub>3</sub>COOH concentrations due to reactions R1 and R2, (a) the concentration change of HCOOH due to reaction R1, (b) the concentration change of CH<sub>3</sub>COOH due to reaction R2.

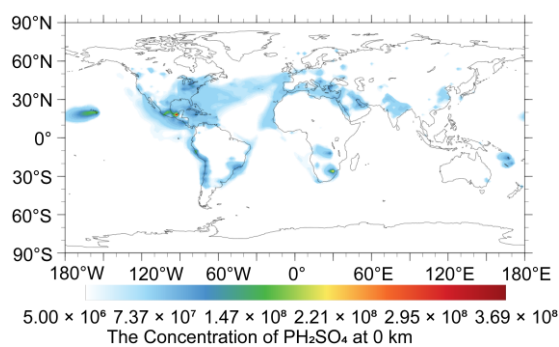

**Figure S10.** Global PH<sub>2</sub>SO<sub>4</sub> concentrations in “base” version.

---

## Reference

- Berndt, T., Kaethner, R., Voigtländer, J., Stratmann, F., Pfeifle, M., Reichle, P., Sipilä, M., Kulmala, M., and Olzmann, M.: Kinetics of the unimolecular reaction of  $\text{CH}_2\text{OO}$  and the bimolecular reactions with the water monomer, acetaldehyde and acetone under atmospheric conditions, *PCCP*, 17, 19862-19873, 10.1039/C5CP02224J, 2015.
- Kuwata, K. T., Hermes, M. R., Carlson, M. J., and Zogg, C. K.: Computational Studies of the Isomerization and Hydration Reactions of Acetaldehyde Oxide and Methyl Vinyl Carbonyl Oxide, *The Journal of Physical Chemistry A*, 114, 9192-9204, 10.1021/jp105358v, 2010.
- Long, B., Bao, J. L., and Truhlar, D. G.: Atmospheric Chemistry of Criegee Intermediates: Unimolecular Reactions and Reactions with Water, *J. Am. Chem. Soc.*, 138, 14409-14422, 10.1021/jacs.6b08655, 2016.
- Long, B., Bao, J. L., and Truhlar, D. G.: Kinetics of the Strongly Correlated  $\text{CH}_3\text{O} + \text{O}_2$  Reaction: The Importance of Quadruple Excitations in Atmospheric and Combustion Chemistry, *J. Am. Chem. Soc.*, 141, 611-617, 10.1021/jacs.8b11766, 2019.
- Long, B., Xia, Y., and Truhlar, D. G.: Quantitative Kinetics of  $\text{HO}_2$  Reactions with Aldehydes in the Atmosphere: High-Order Dynamic Correlation, Anharmonicity, and Falloff Effects Are All Important, *J. Am. Chem. Soc.*, 144, 19910-19920, 10.1021/jacs.2c07994, 2022.
- Long, B., Xia, Y., Zhang, Y.-Q., and Truhlar, D. G.: Kinetics of Sulfur Trioxide Reaction with Water Vapor to Form Atmospheric Sulfuric Acid, *J. Am. Chem. Soc.*, 145, 19866-19876, 10.1021/jacs.3c06032, 2023.
- Long, B., Wang, Y., Xia, Y., He, X., Bao, J. L., and Truhlar, D. G.: Atmospheric Kinetics: Bimolecular Reactions of Carbonyl Oxide by a Triple-Level Strategy, *J. Am. Chem. Soc.*, 143, 8402-8413, 10.1021/jacs.1c02029, 2021.
- Sun, Y., Long, B., and Truhlar, D. G.: Unimolecular Reactions of E-Glycolaldehyde Oxide and Its Reactions with One and Two Water Molecules, *Research*, 6, 0143, 10.34133/research.0143, 2024.
- Xia, Y., Zhang, W., Tang, X., and Long, B.: Quantitative Kinetics of the Hydrogen Shift Reaction of Methylthiomethyl Peroxy Radical ( $\text{CH}_3\text{SCH}_2\text{OO}$ ) in the Atmosphere, *The Journal of Physical Chemistry A*, 129, 2275-2285, 10.1021/acs.jpca.4c06818, 2025.
- Zheng, J. and Truhlar, D. G.: Multi-path variational transition state theory for chemical reaction rates of complex polyatomic species: ethanol + OH reactions, *Faraday Discuss.*, 157, 59-88, 10.1039/C2FD20012K, 2012.
- Zheng, J., Mielke, S. L., Clarkson, K. L., and Truhlar, D. G.: MSTor: A program for calculating partition functions, free energies, enthalpies, entropies, and heat capacities of complex molecules including torsional anharmonicity, *Comput. Phys. Commun.*, 183, 1803-1812, <https://doi.org/10.1016/j.cpc.2012.03.007>, 2012.
